# Supplementary material
Source: PubMed Central journal article supplement (PMC11127180)

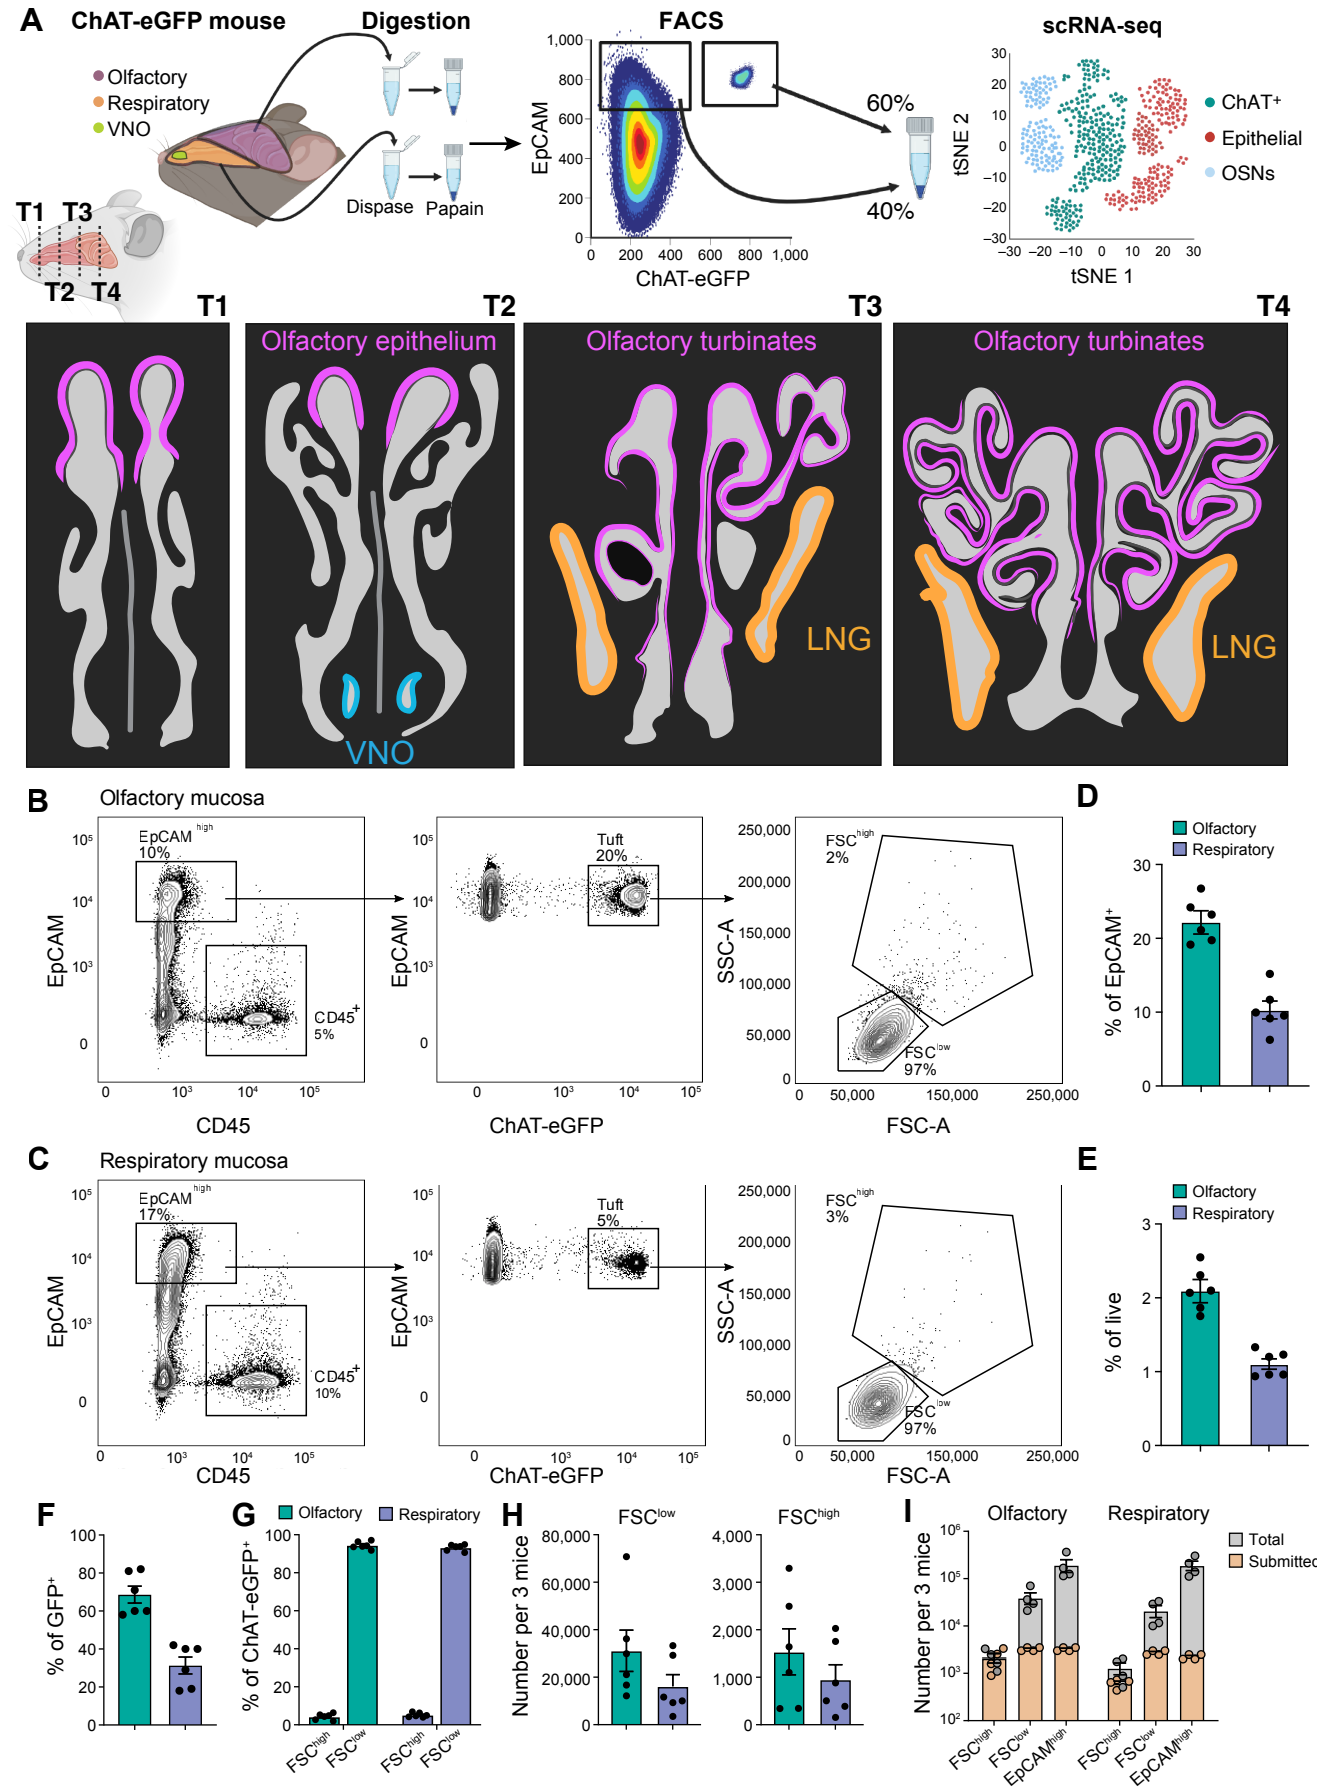

Supplement: NIHMS1986347-supplement-Fig__S1.pdf [file NIHMS1986347-supplement-Fig__S1.pdf]

● Keratin 5 ● Ki67 ○ OMP ● Hoechst

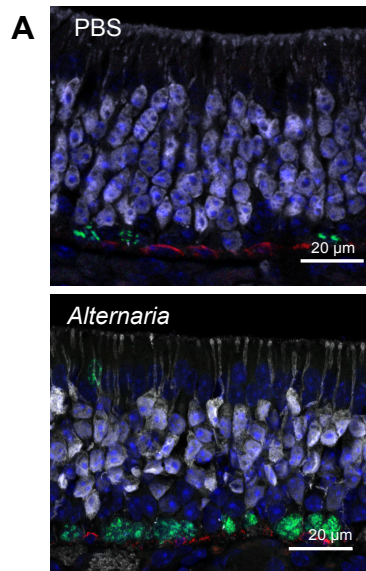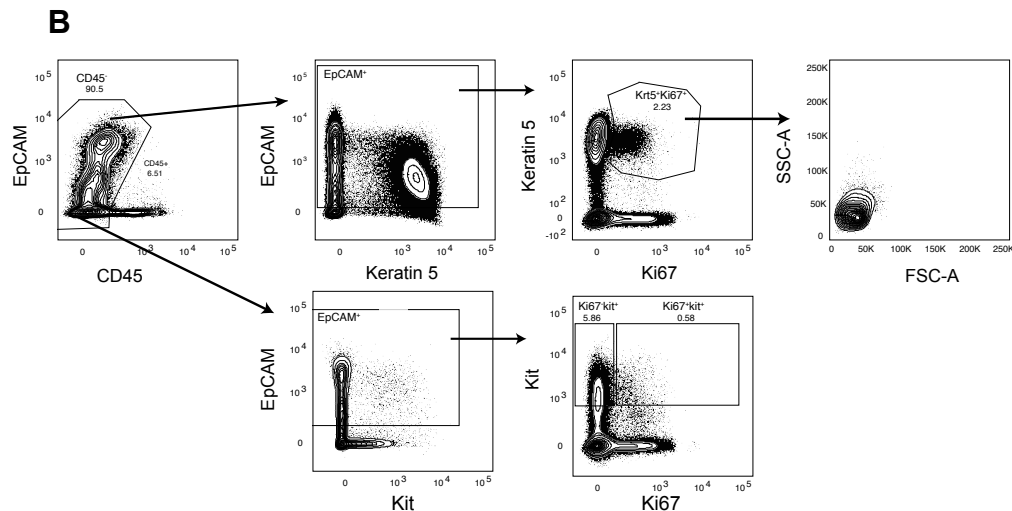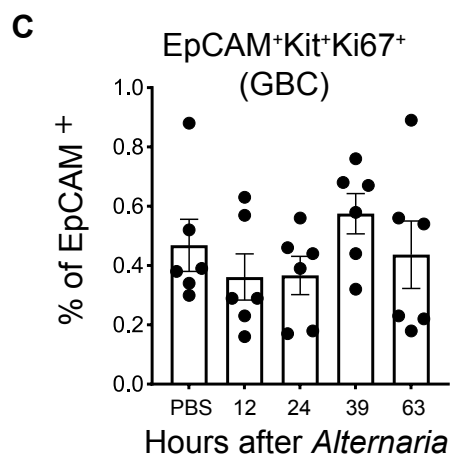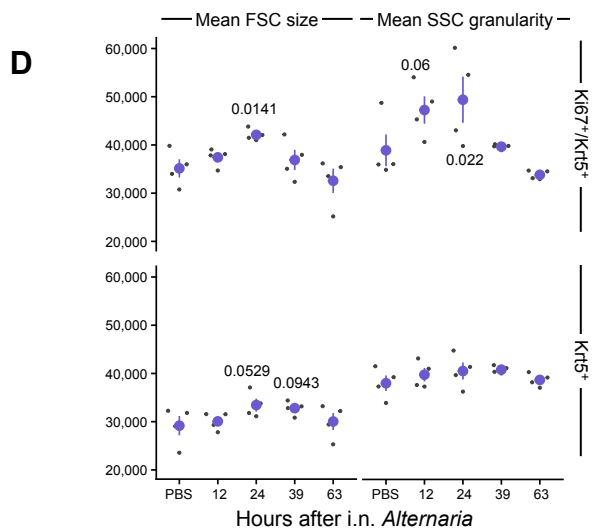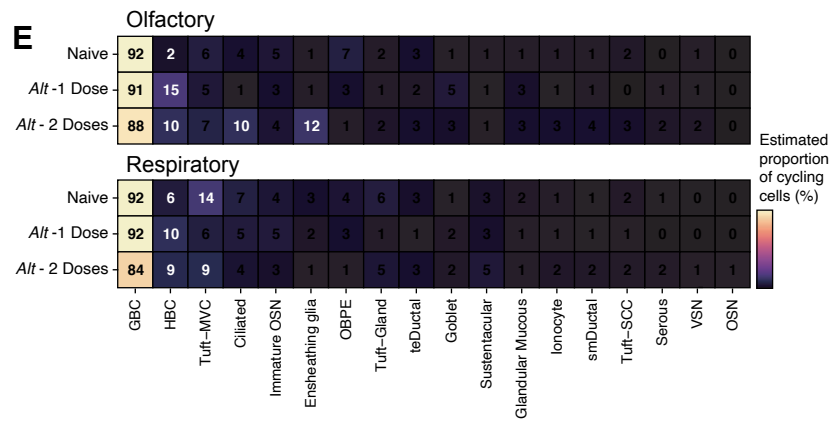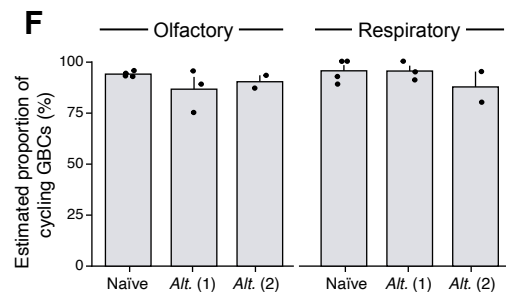

Supplement: NIHMS1986347-supplement-Fig__S10.pdf [file NIHMS1986347-supplement-Fig__S10.pdf]

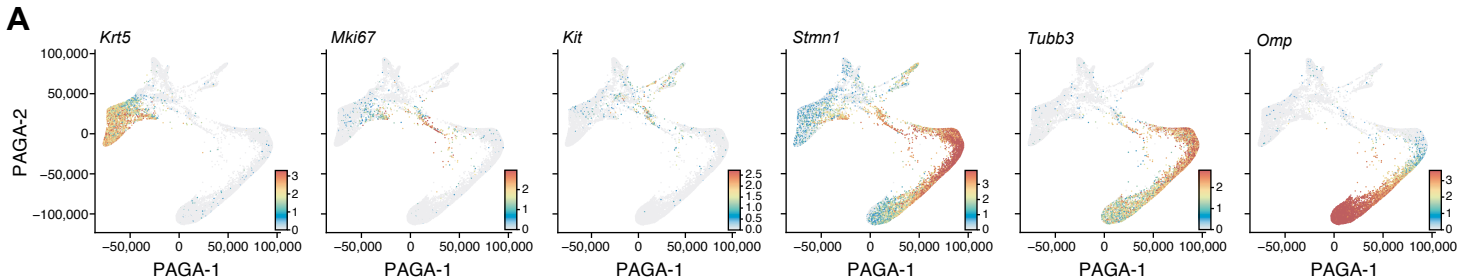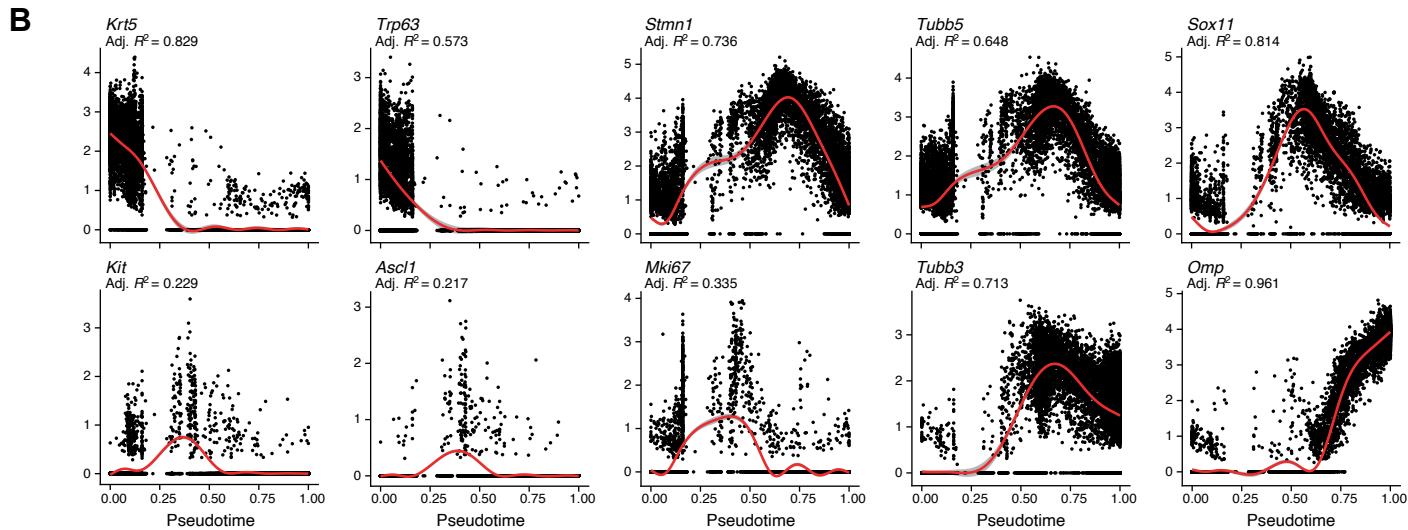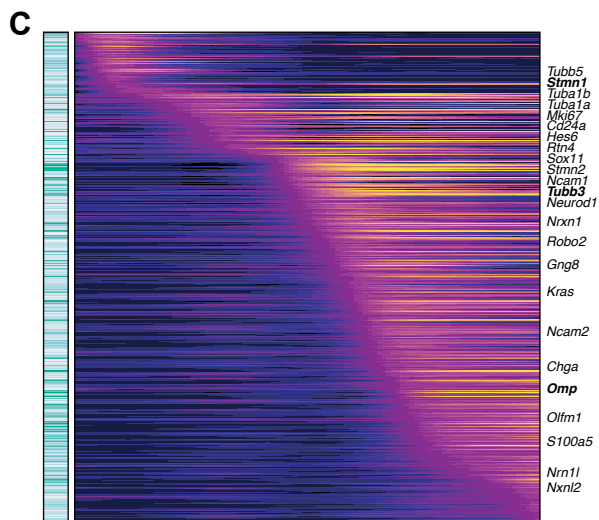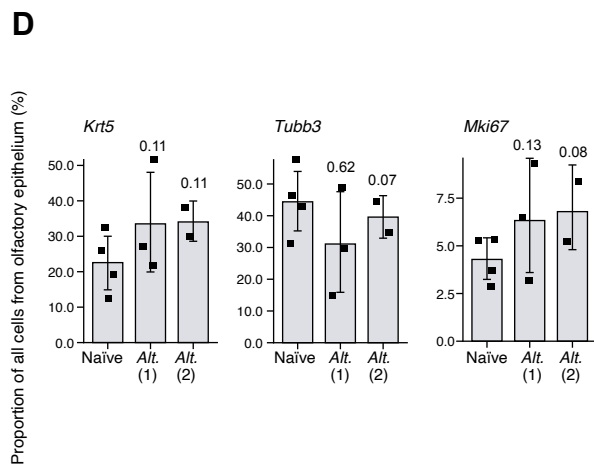

Supplement: NIHMS1986347-supplement-Fig__S11.pdf [file NIHMS1986347-supplement-Fig__S11.pdf]

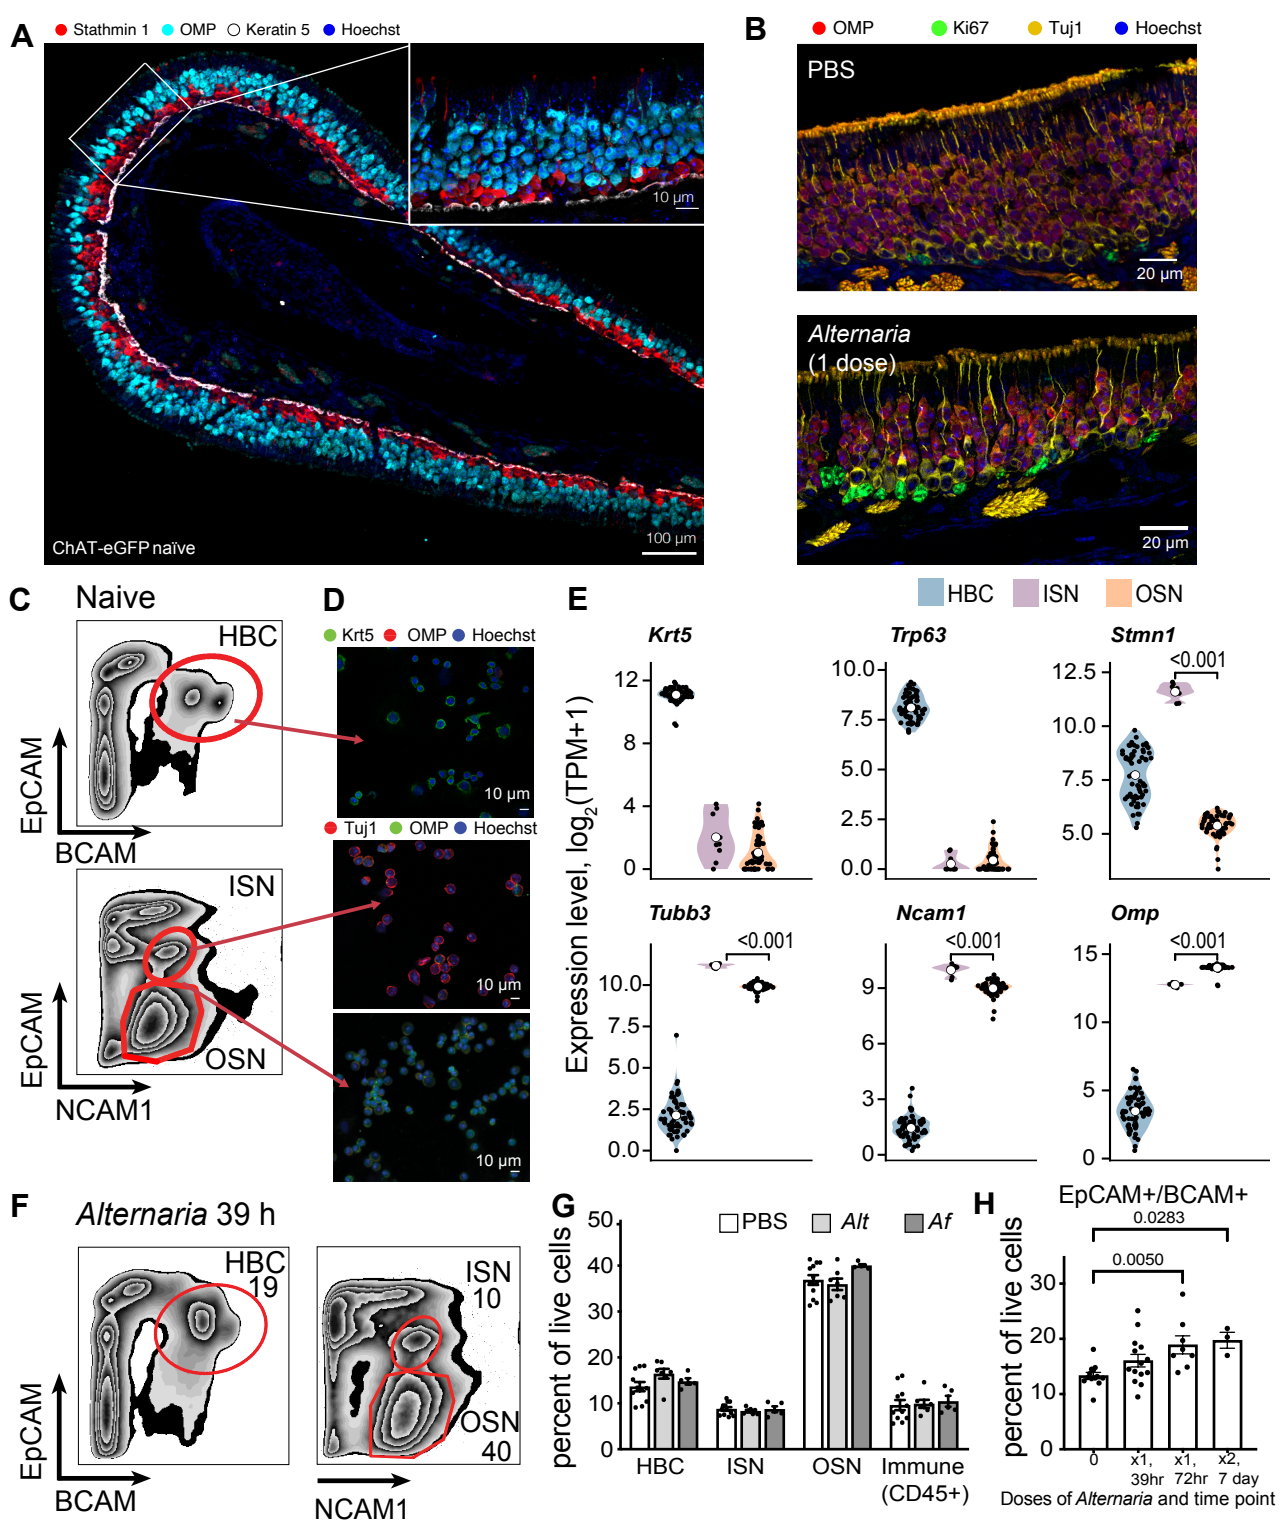

Supplement: NIHMS1986347-supplement-Fig__S12.pdf [file NIHMS1986347-supplement-Fig__S12.pdf]

**A** *Alternaria*

● Up-regulated ● Down-regulated

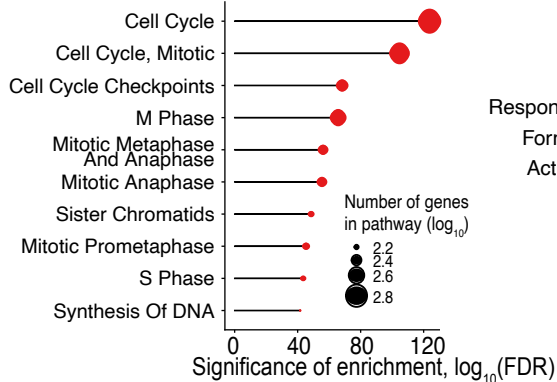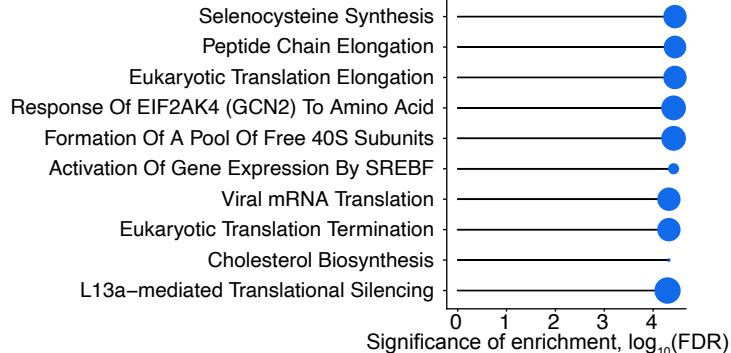**B** *Dp*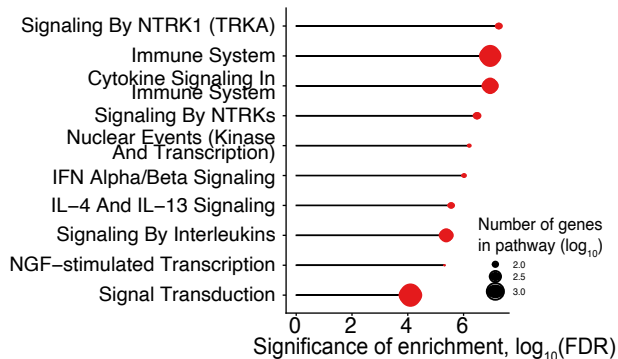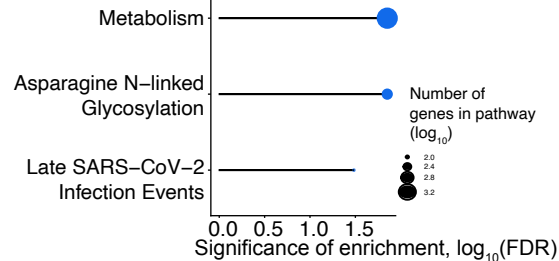**C** *Aspergillus (Af)*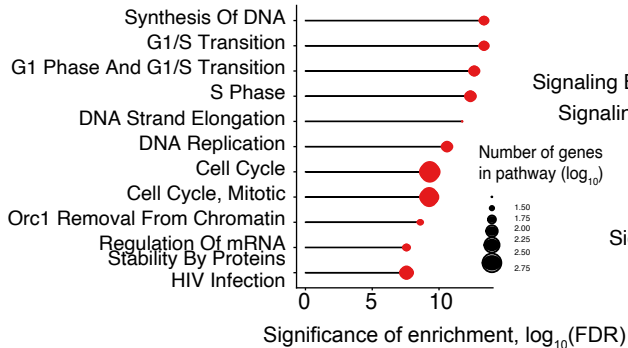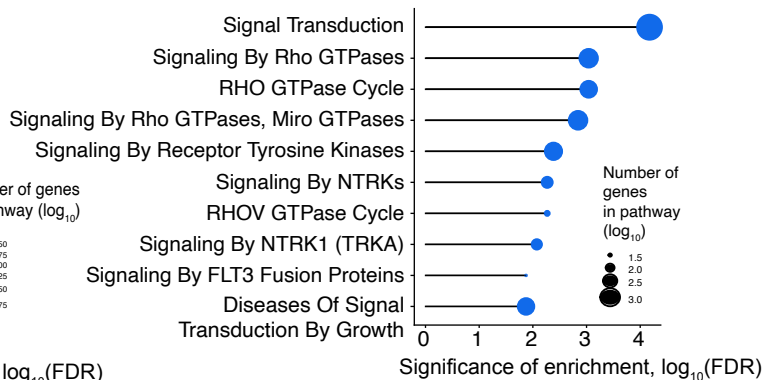

Supplement: NIHMS1986347-supplement-Fig__S13.pdf [file NIHMS1986347-supplement-Fig__S13.pdf]

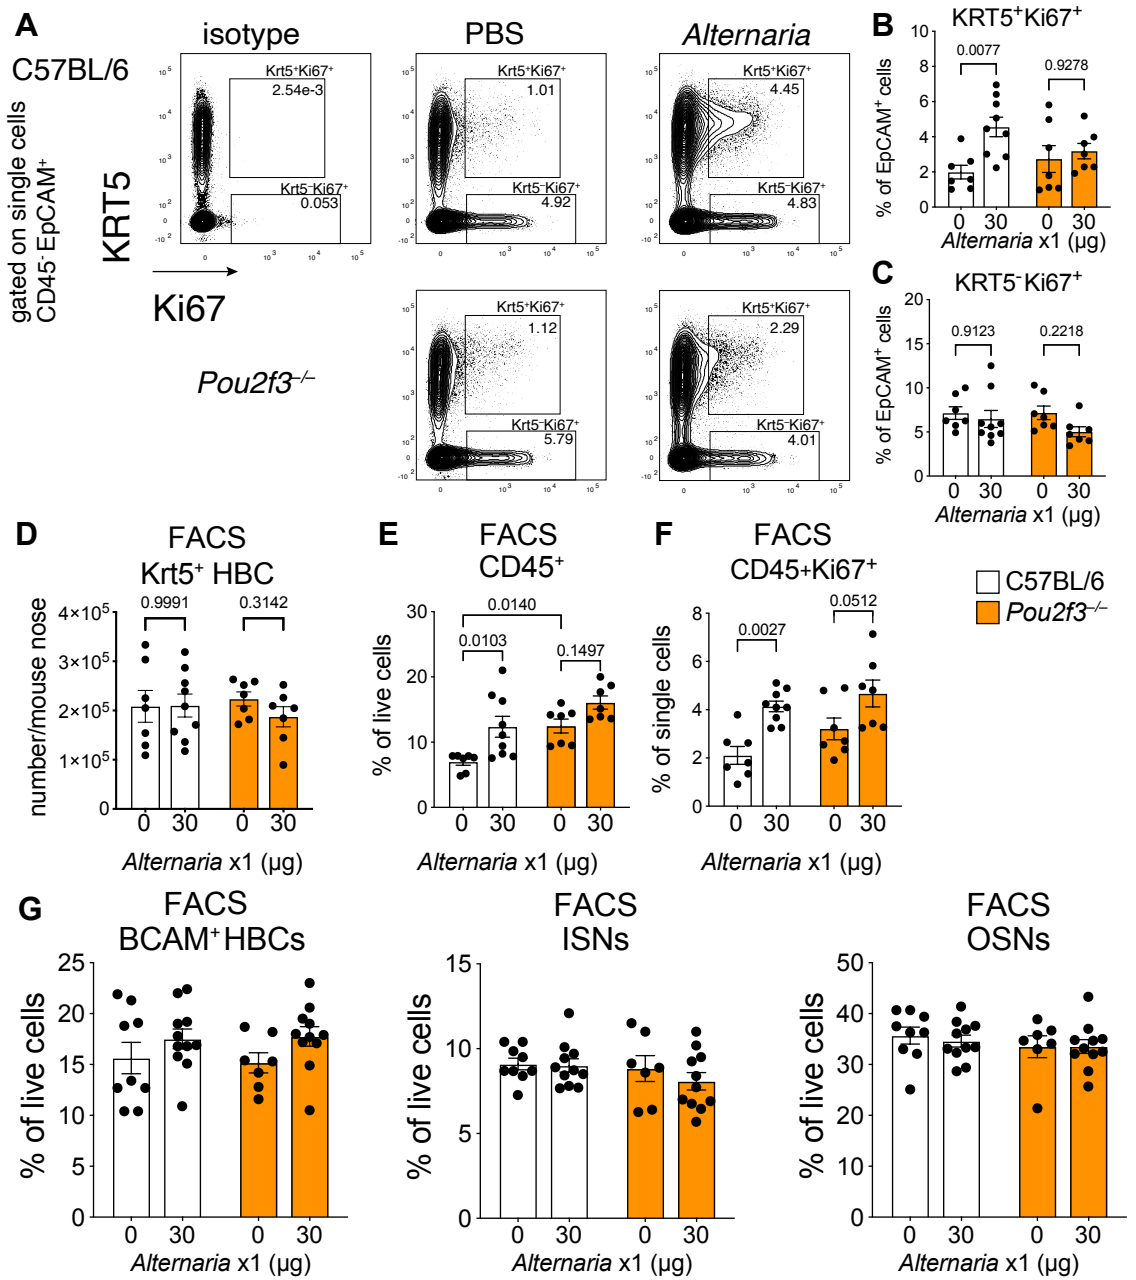

Supplement: NIHMS1986347-supplement-Fig__S14.pdf [file NIHMS1986347-supplement-Fig__S14.pdf]

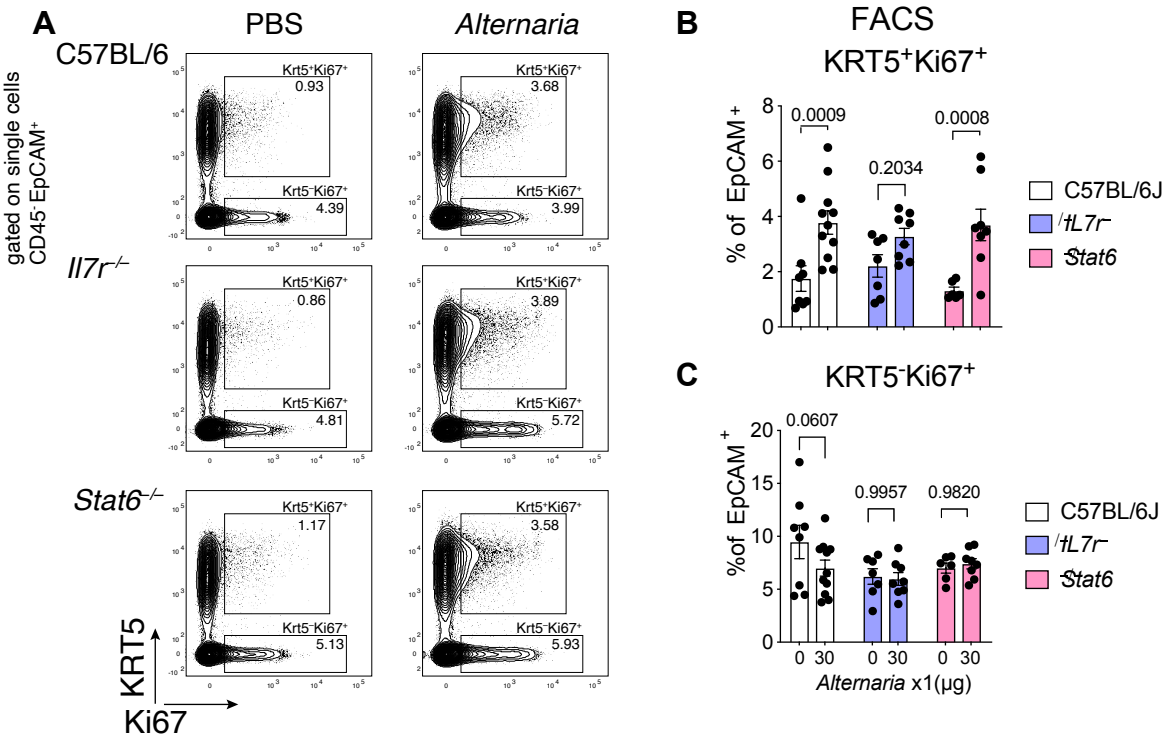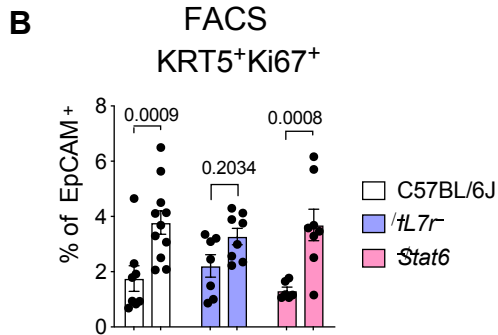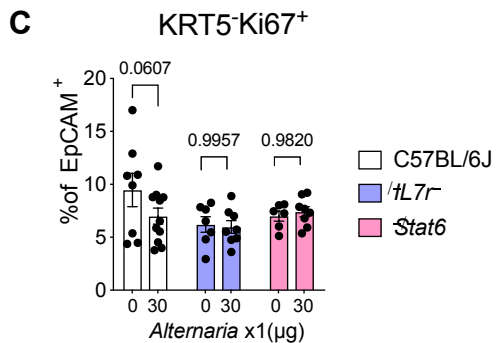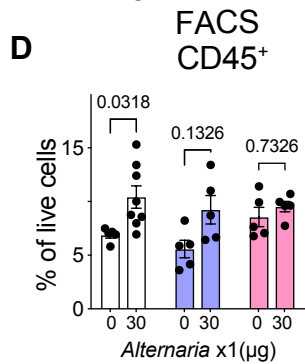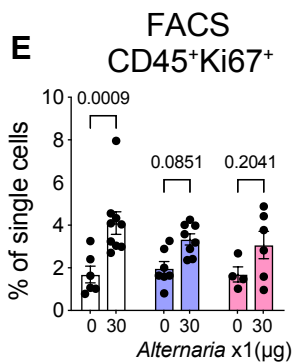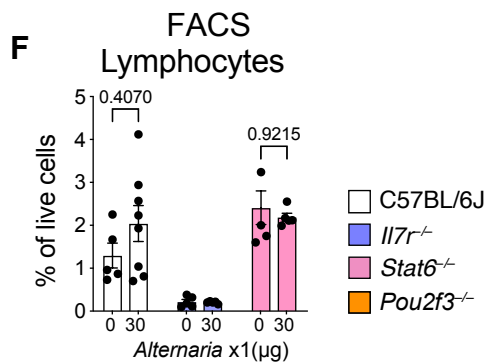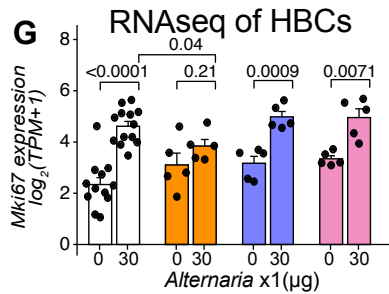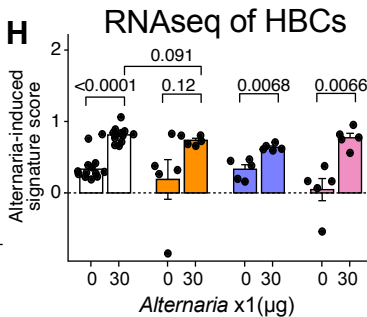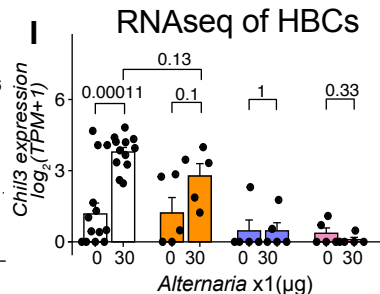

Supplement: NIHMS1986347-supplement-Fig__S15.pdf [file NIHMS1986347-supplement-Fig__S15.pdf]

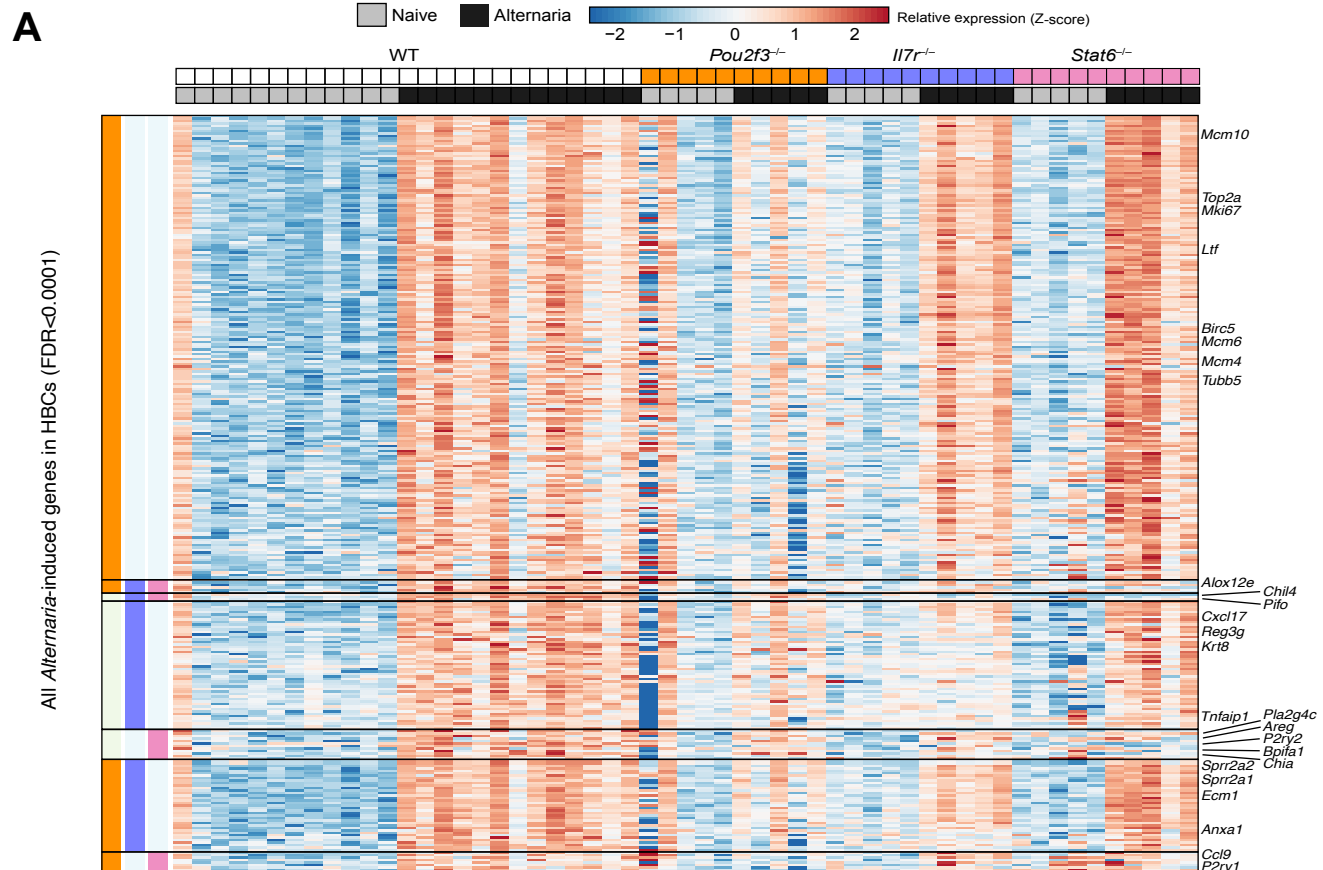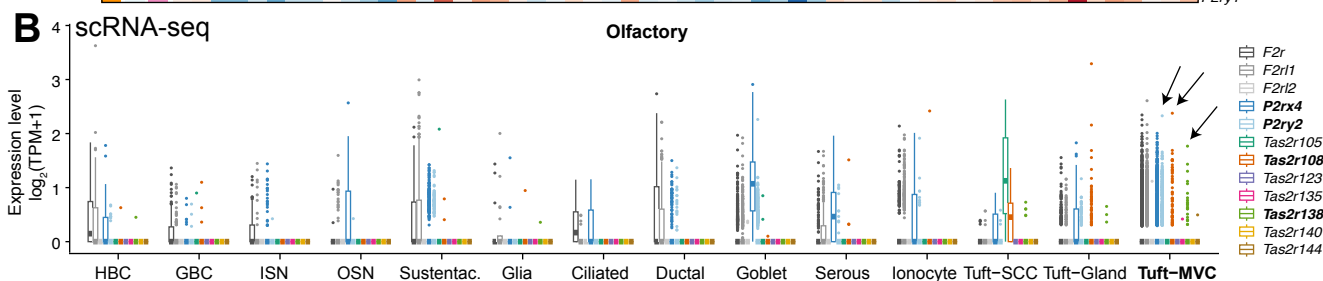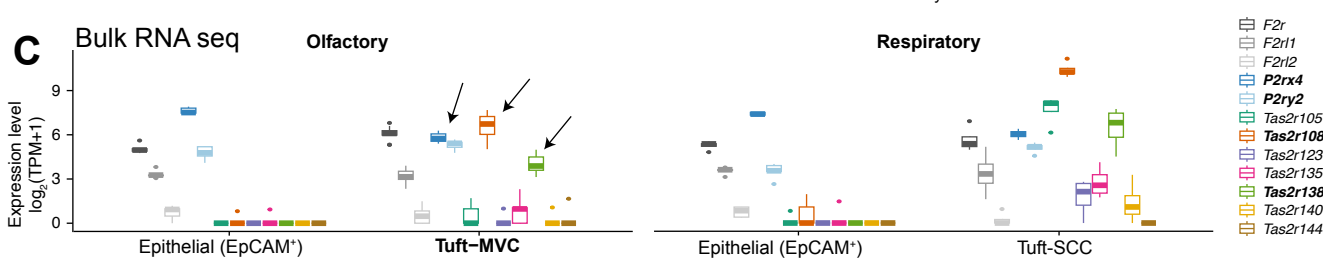

Supplement: NIHMS1986347-supplement-Fig__S16.pdf [file NIHMS1986347-supplement-Fig__S16.pdf]

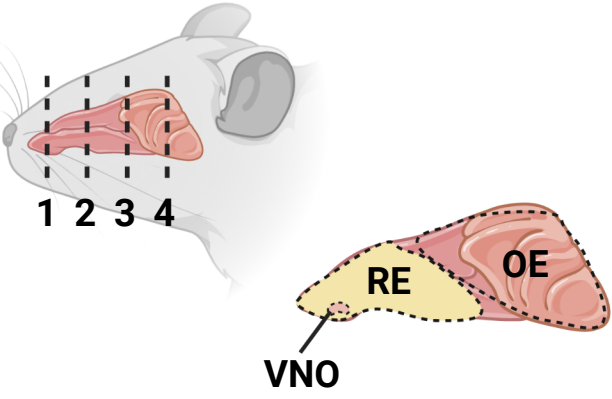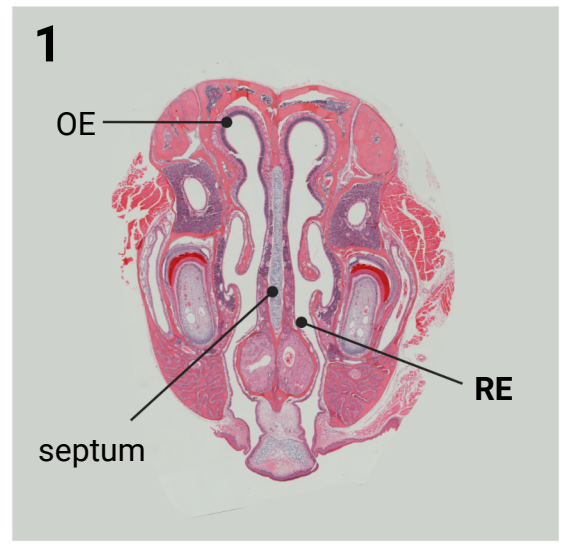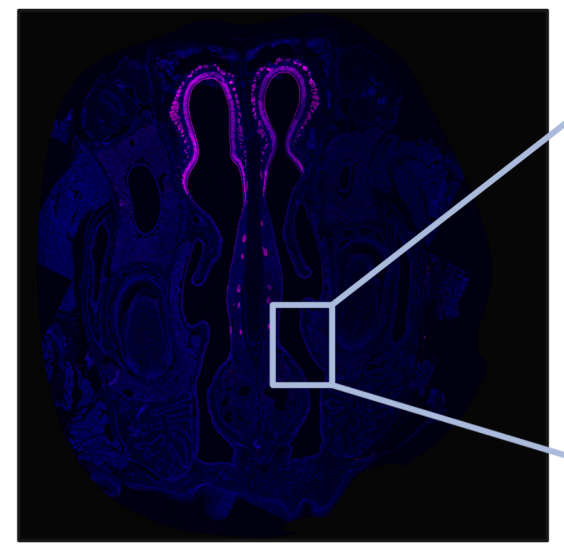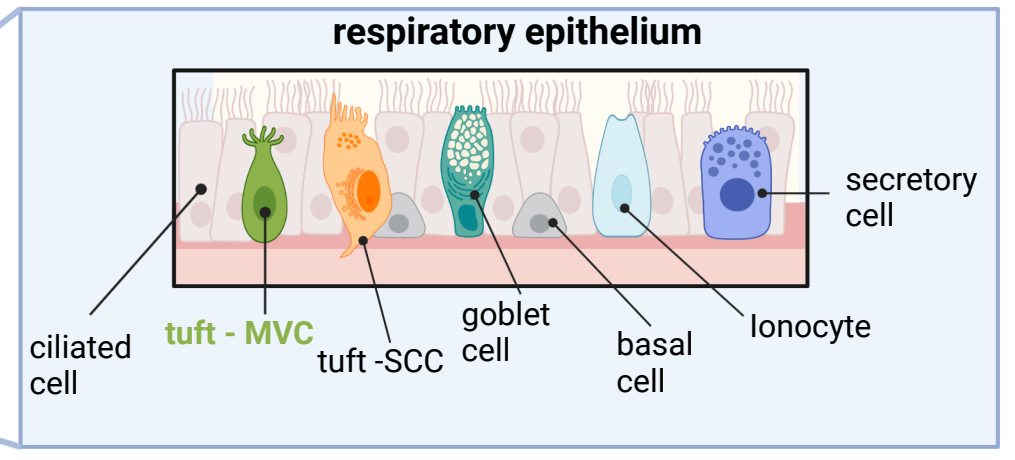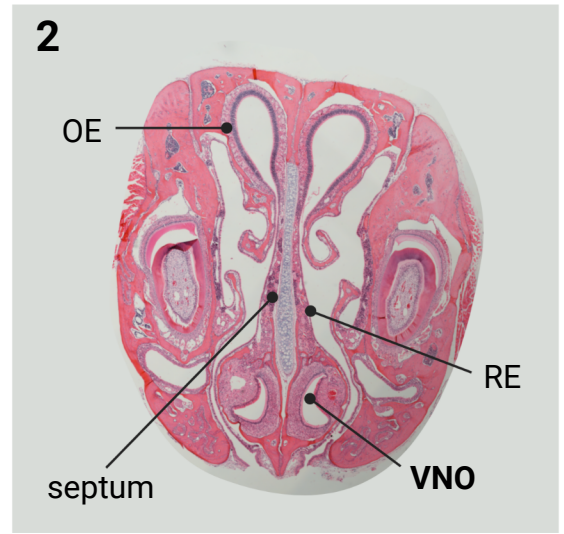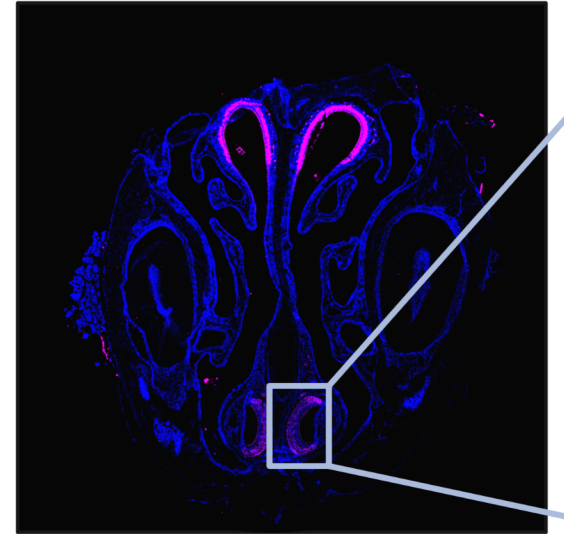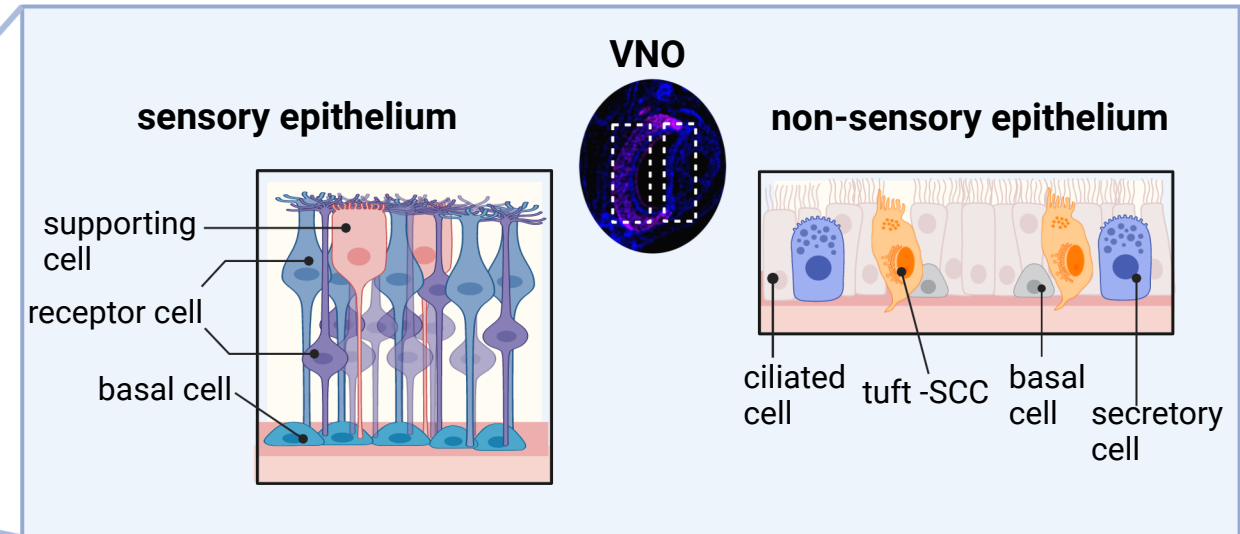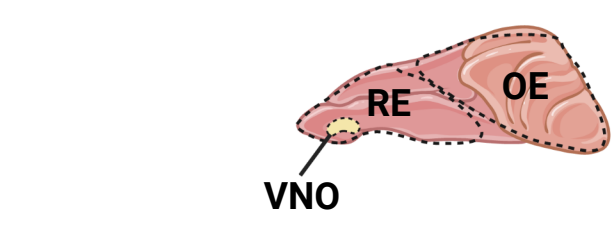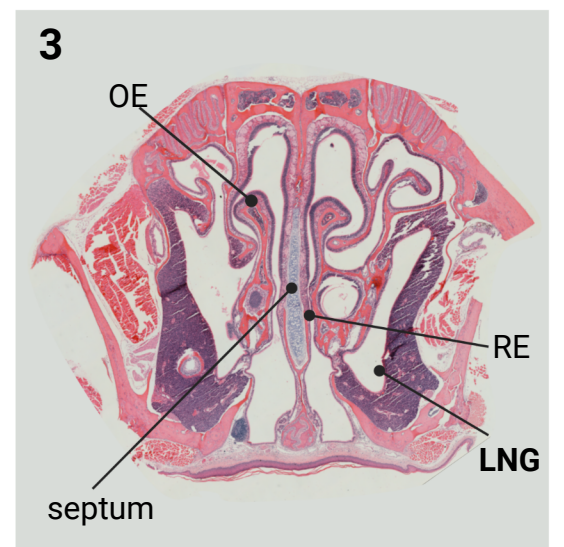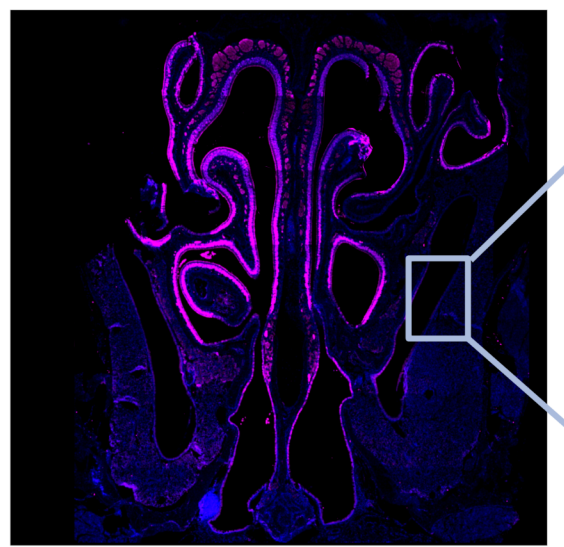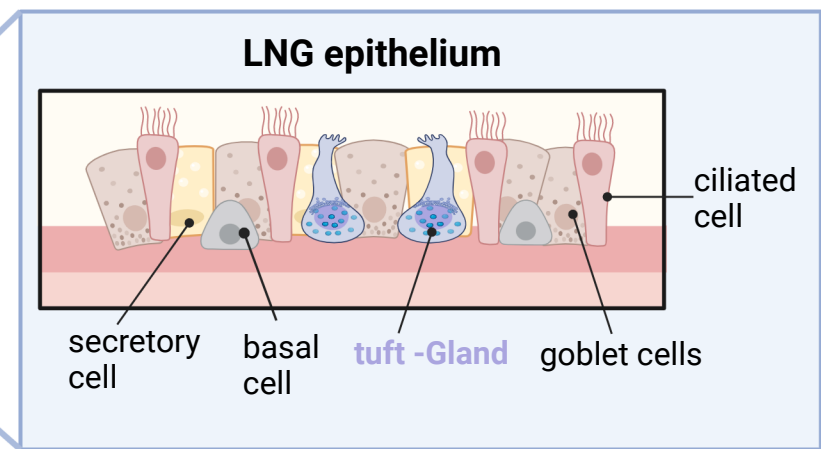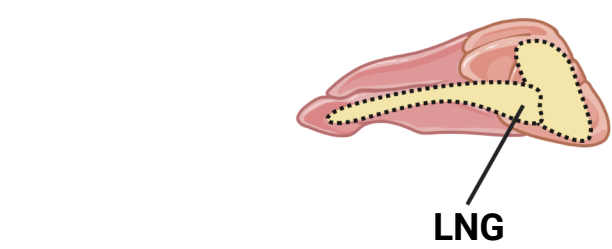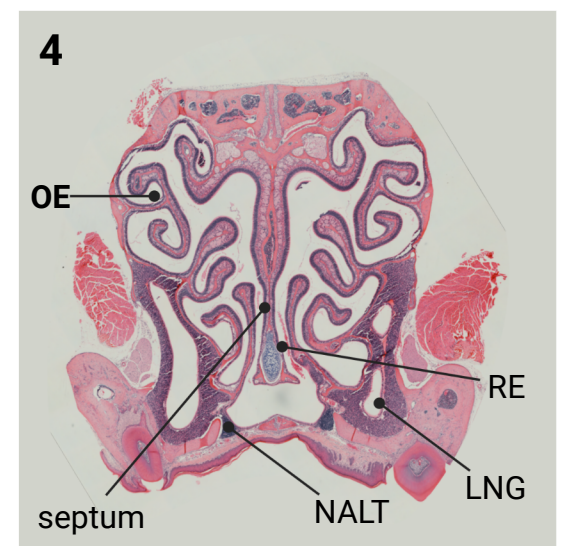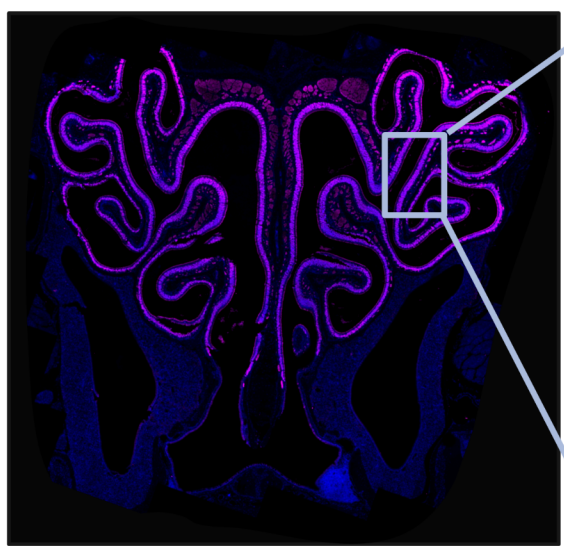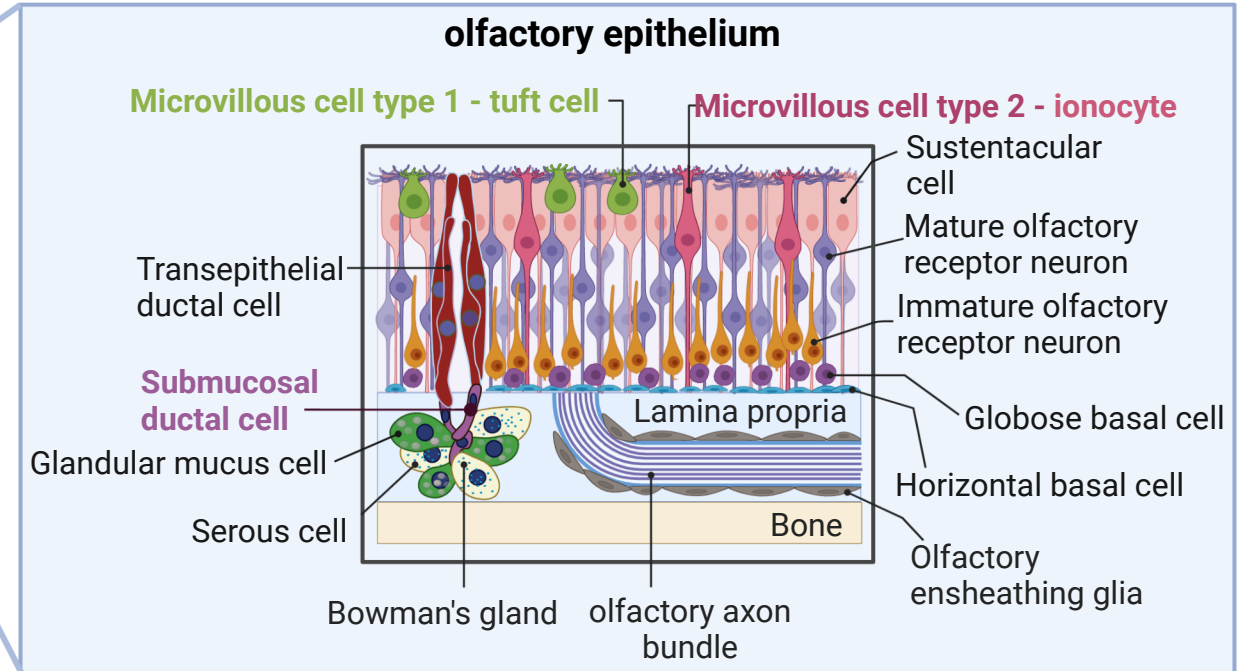

● OMP = olfactory epithelium

Supplement: NIHMS1986347-supplement-Fig__S17.pdf [file NIHMS1986347-supplement-Fig__S17.pdf]

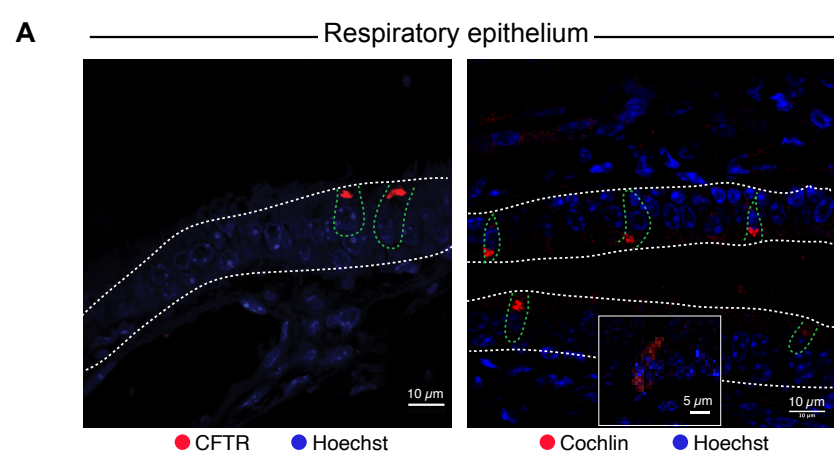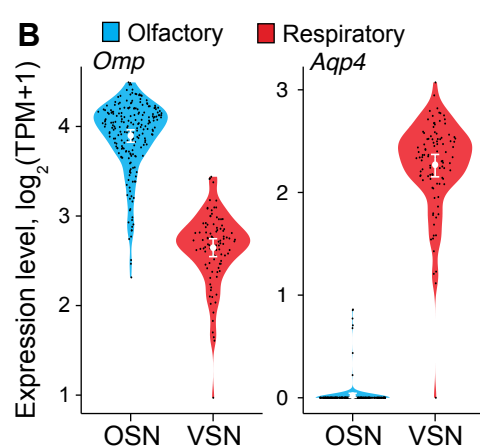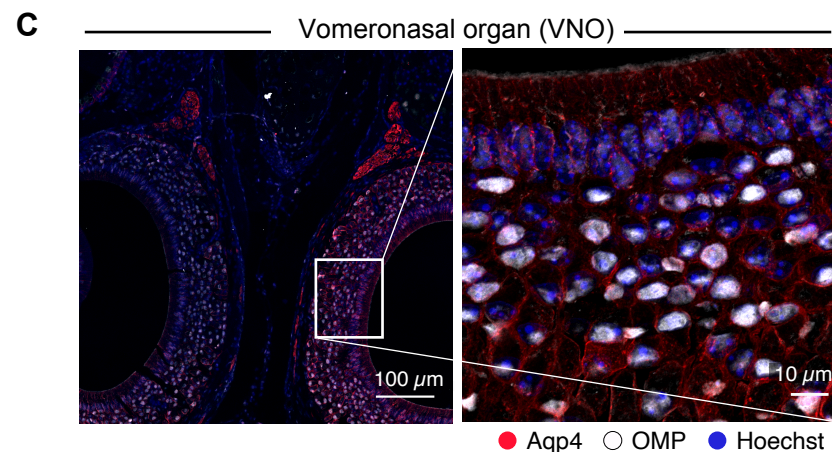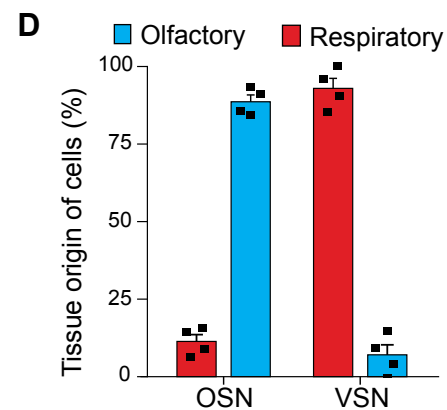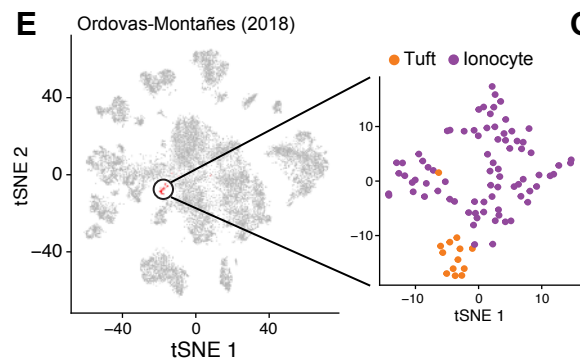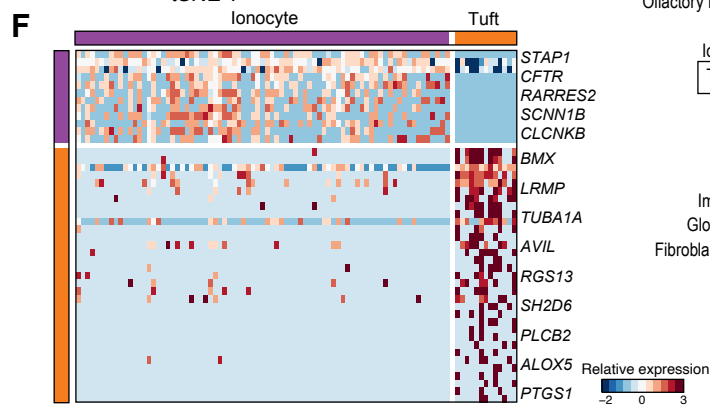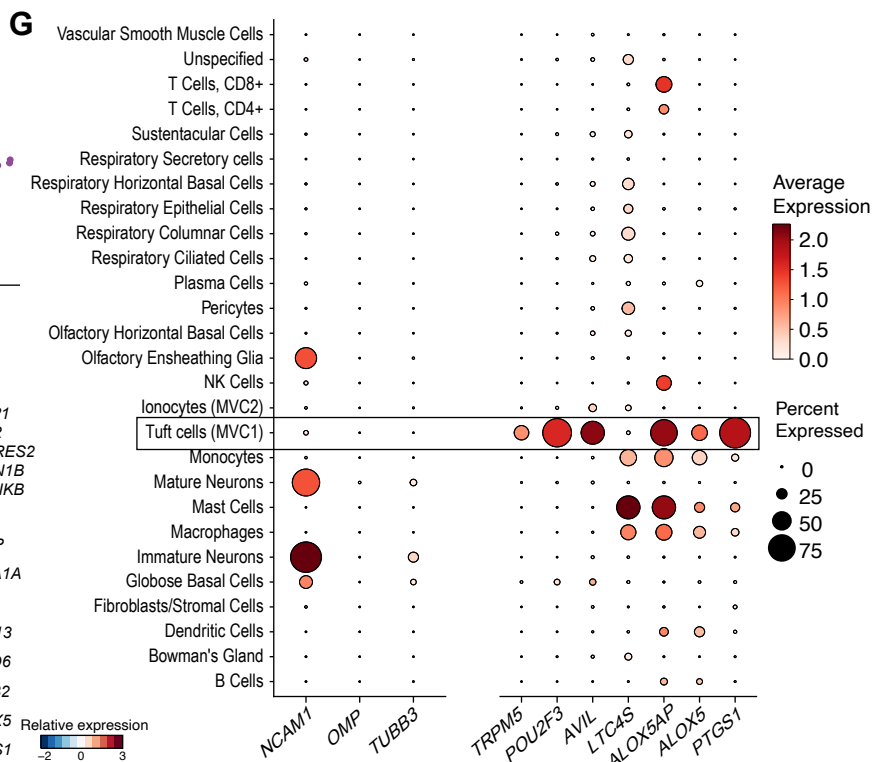

Supplement: NIHMS1986347-supplement-Fig__S2.pdf [file NIHMS1986347-supplement-Fig__S2.pdf]

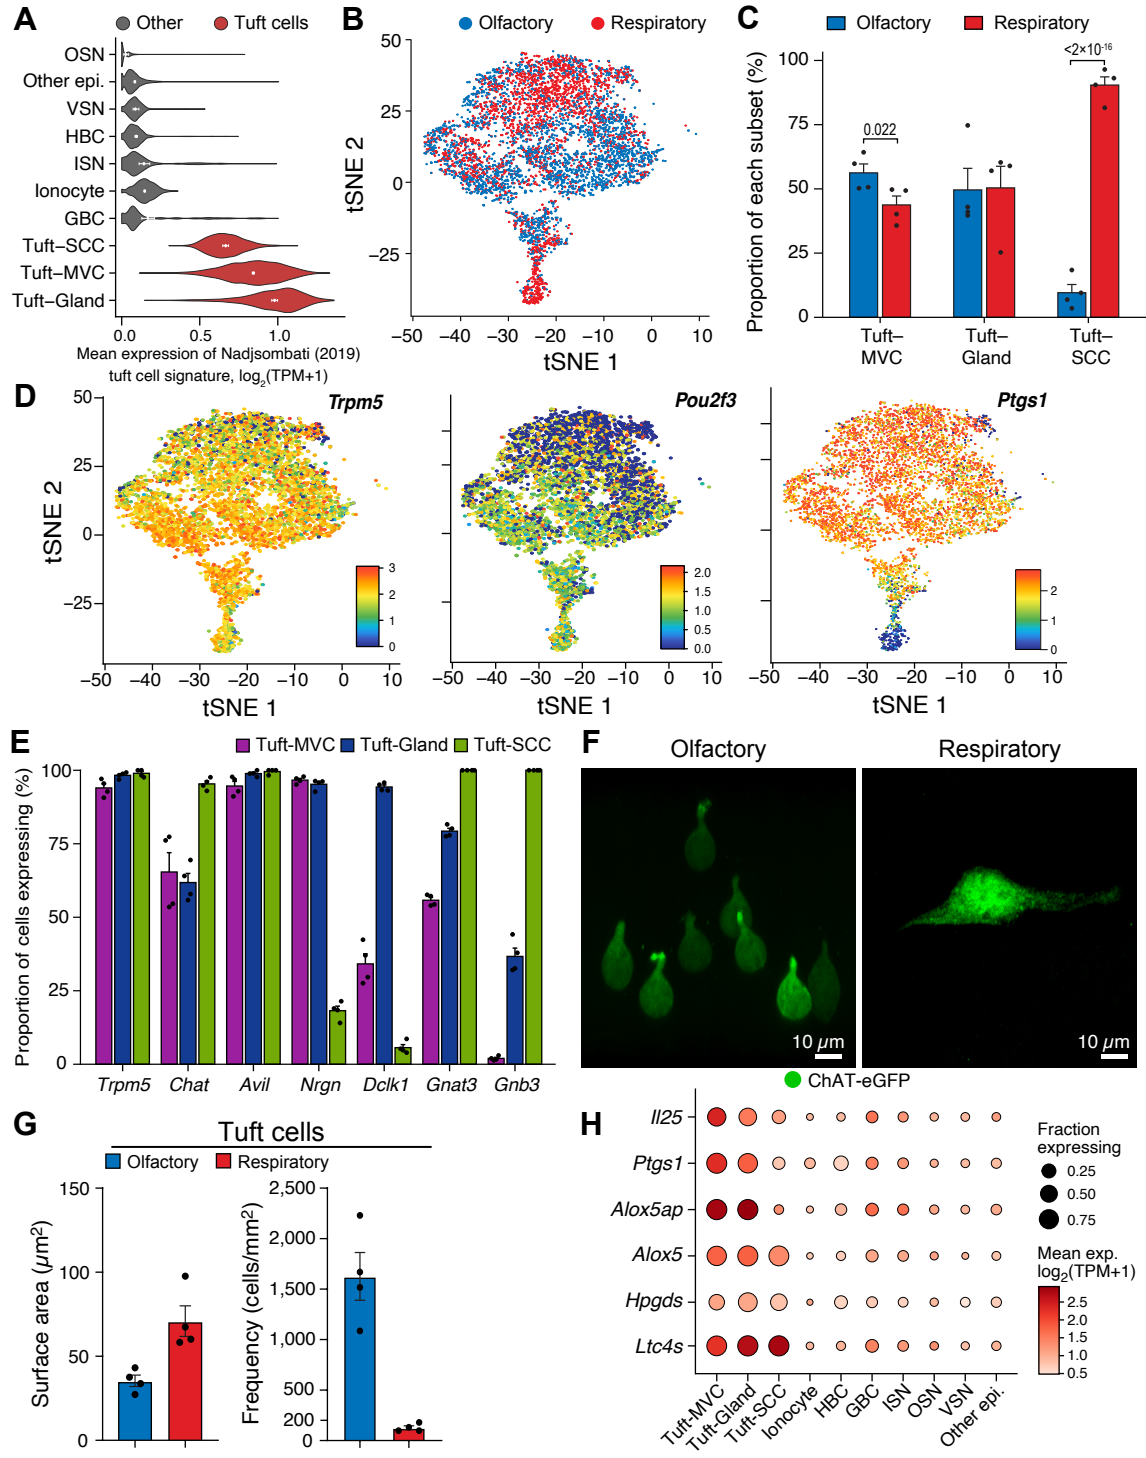

Supplement: NIHMS1986347-supplement-Fig__S3.pdf [file NIHMS1986347-supplement-Fig__S3.pdf]

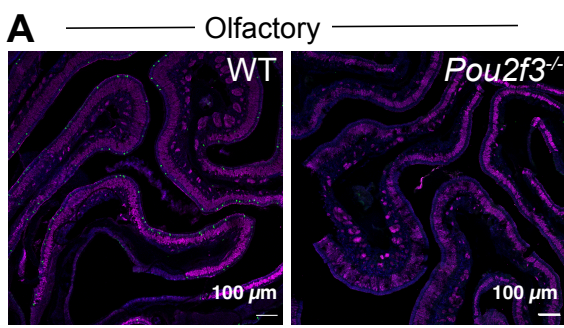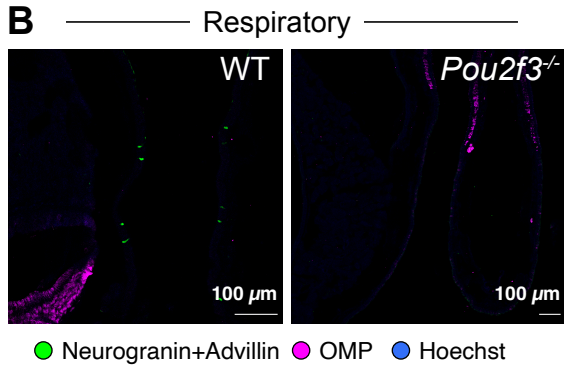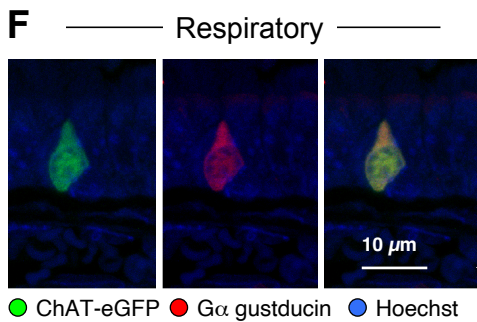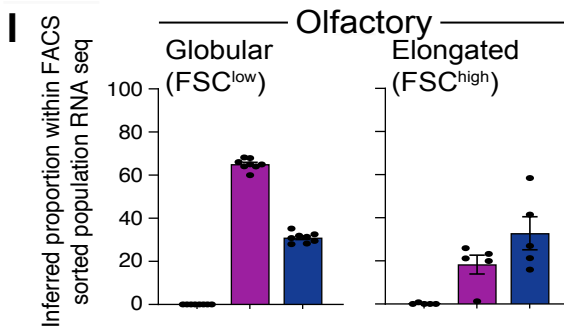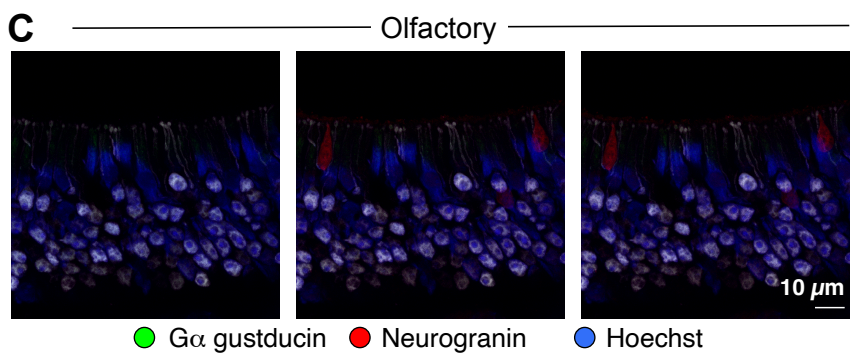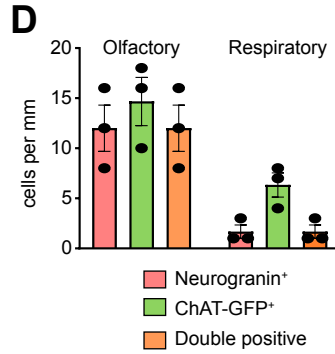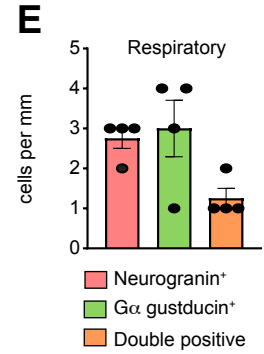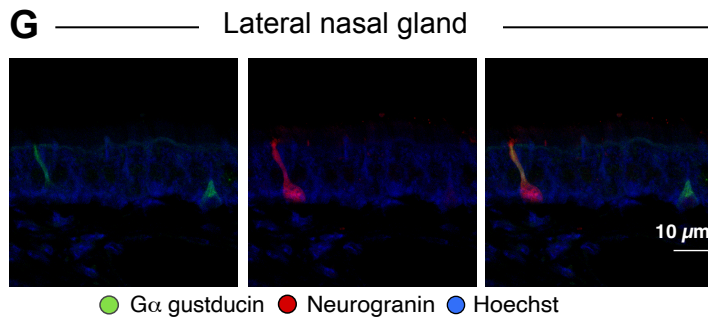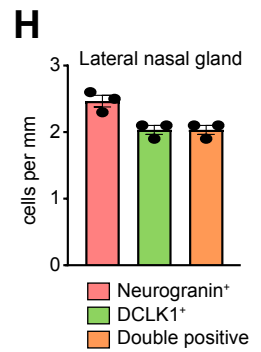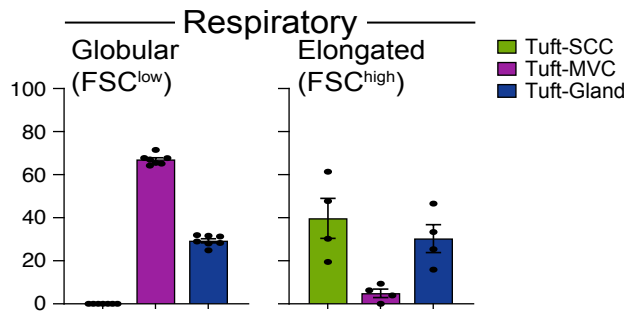

Vomer nasal organ

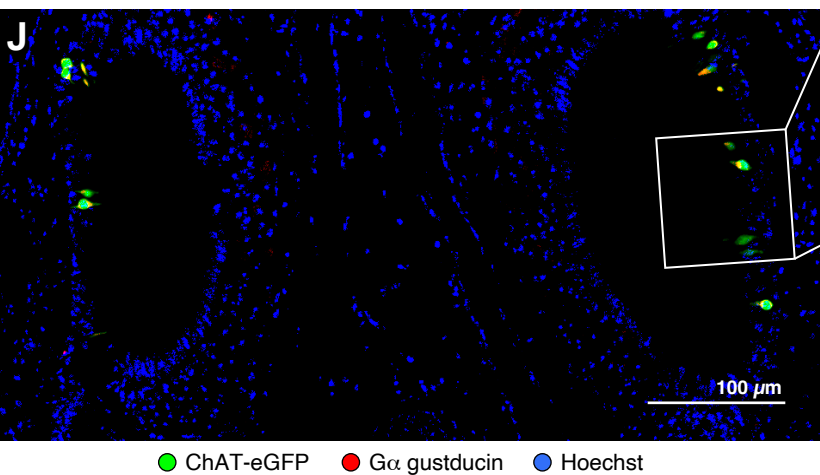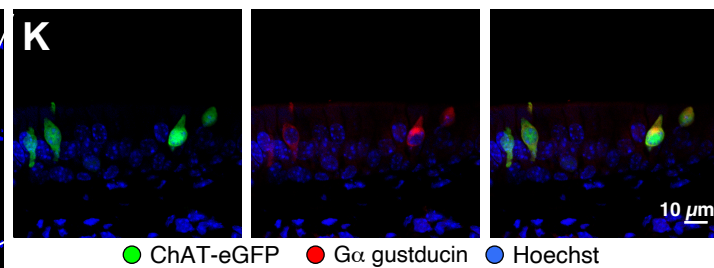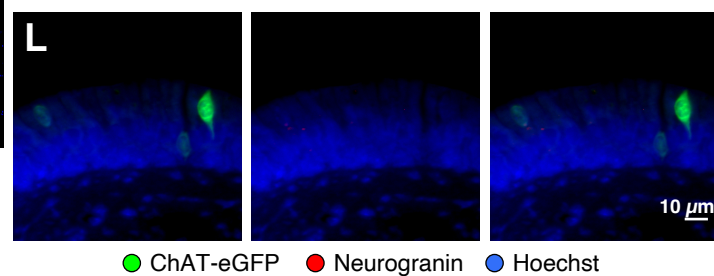

Supplement: NIHMS1986347-supplement-Fig__S4.pdf [file NIHMS1986347-supplement-Fig__S4.pdf]

**A****Allergen challenge**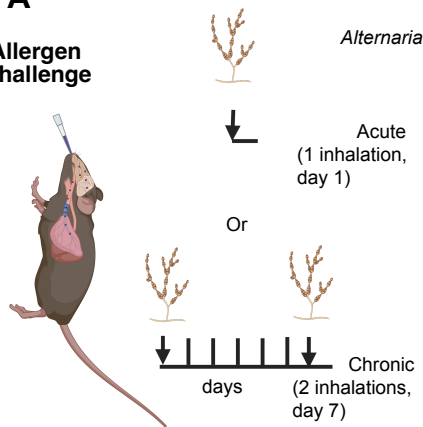**B****Respiratory**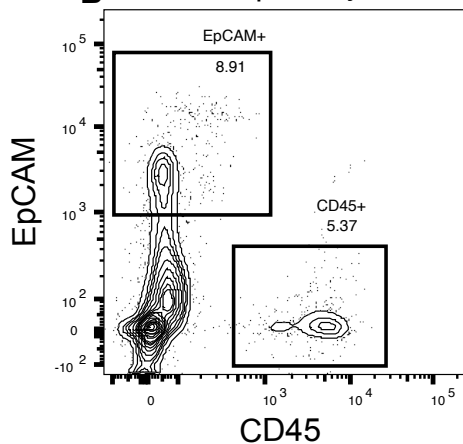**Olfactory**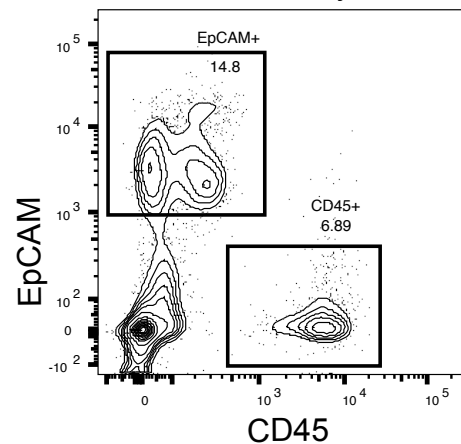**C**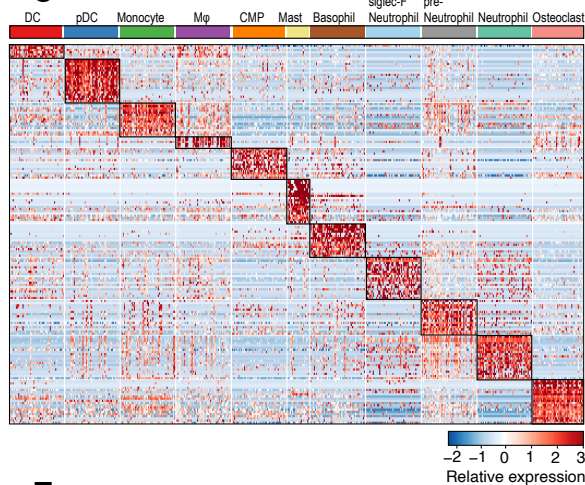**D**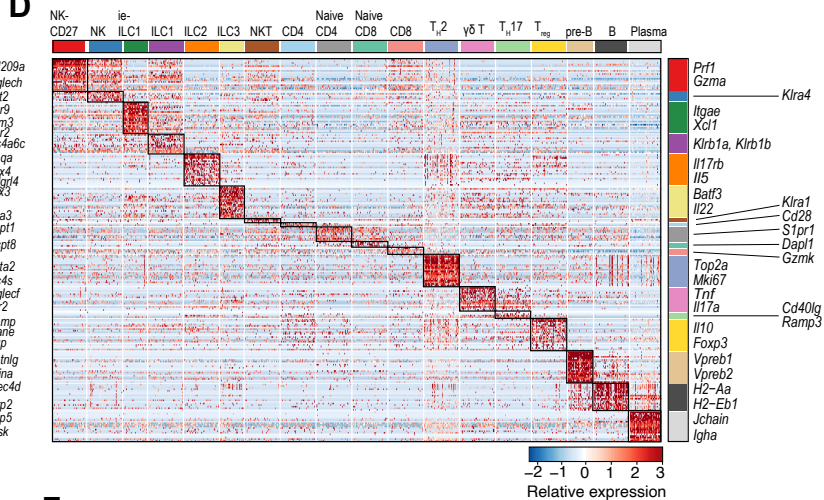**E****Olfactory**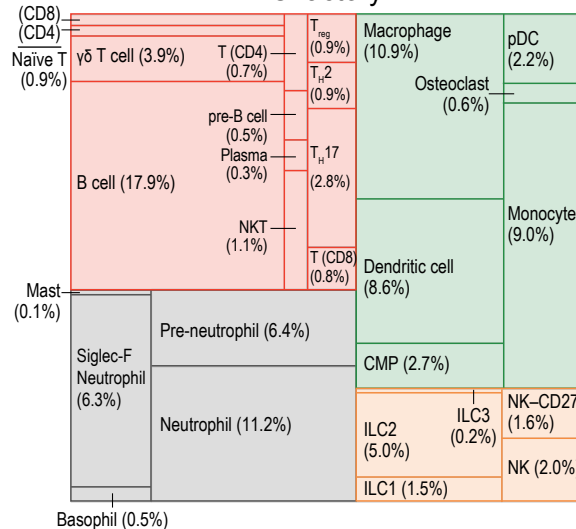**F****Respiratory**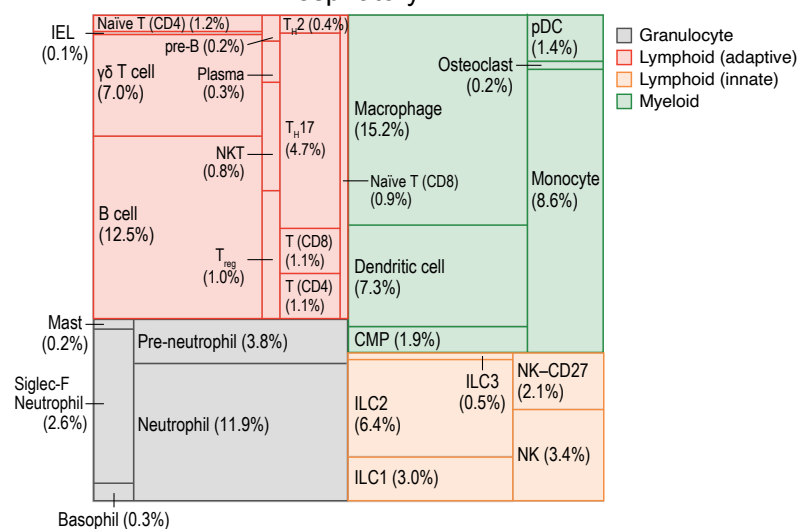

Supplement: NIHMS1986347-supplement-Fig__S5.pdf [file NIHMS1986347-supplement-Fig__S5.pdf]

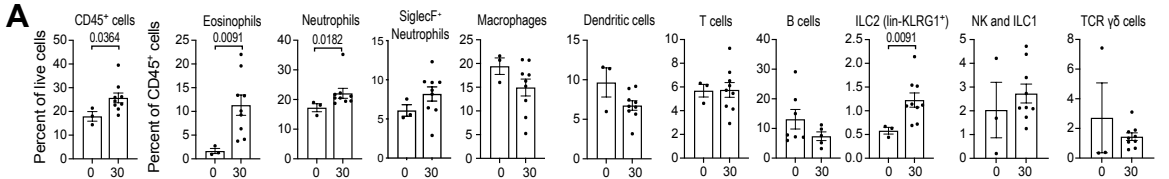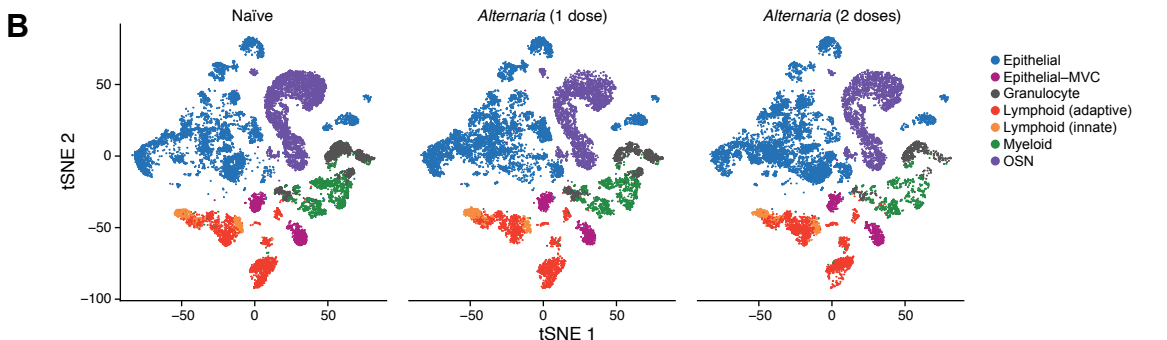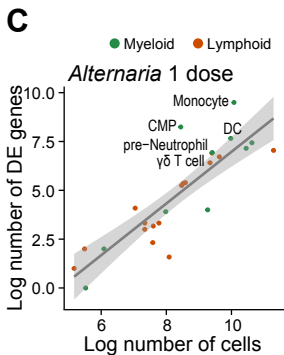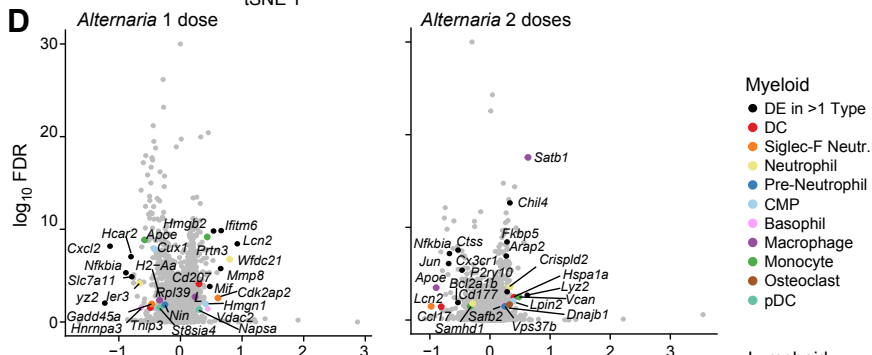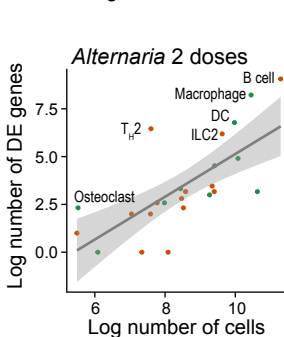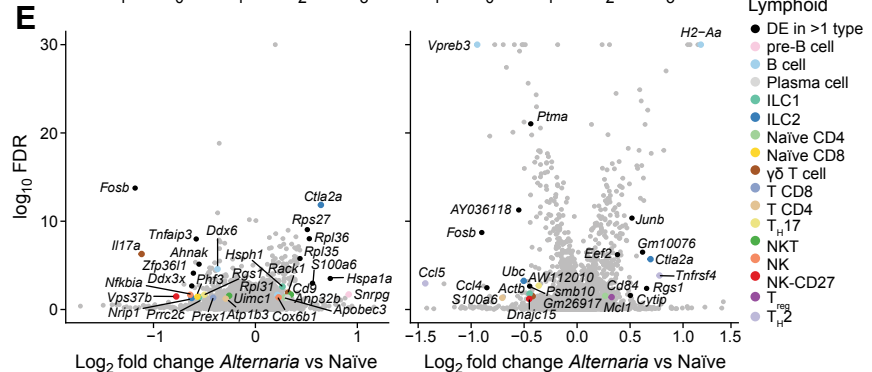

Supplement: NIHMS1986347-supplement-Fig__S6.pdf [file NIHMS1986347-supplement-Fig__S6.pdf]

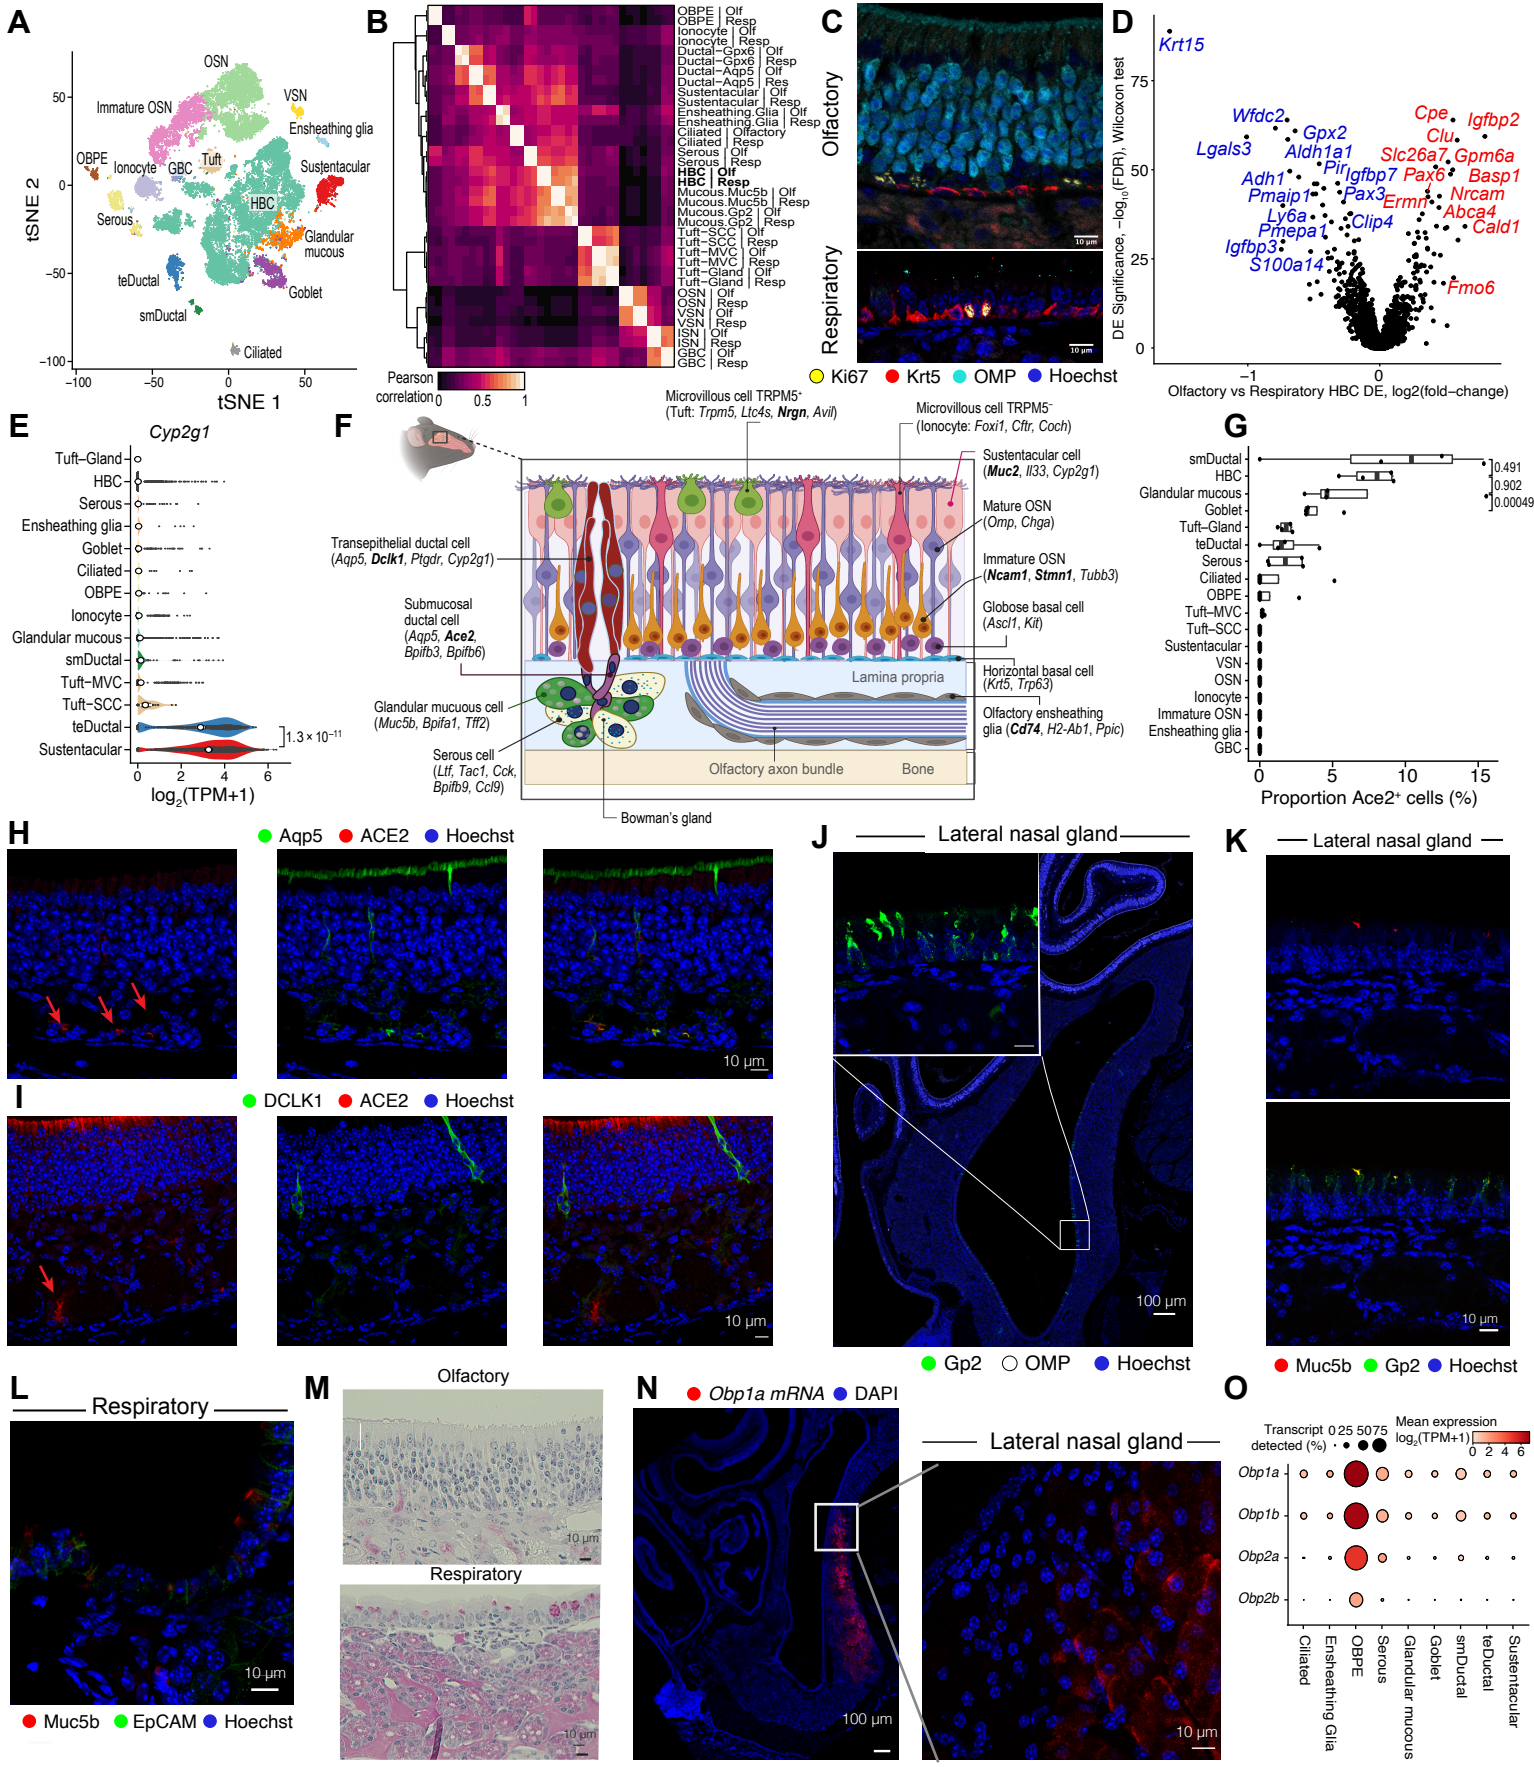

Supplement: NIHMS1986347-supplement-Fig__S7.pdf [file NIHMS1986347-supplement-Fig__S7.pdf]

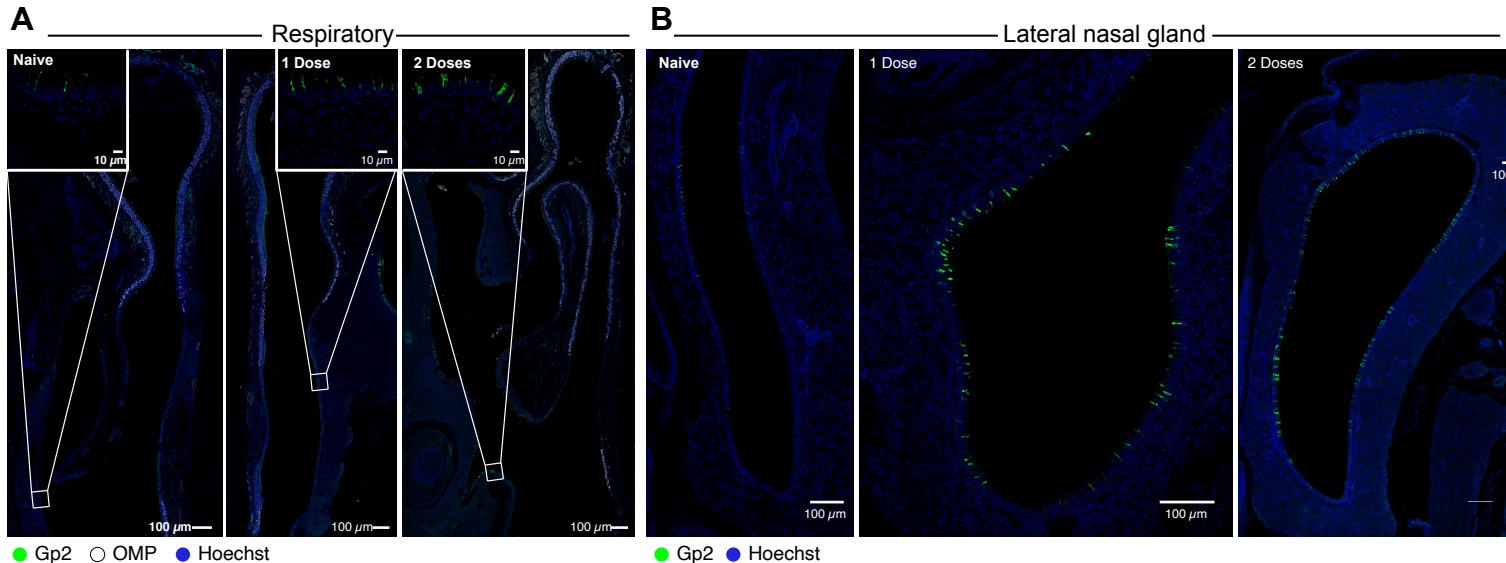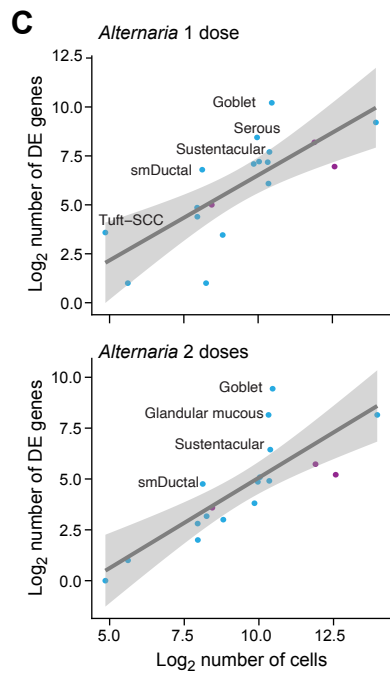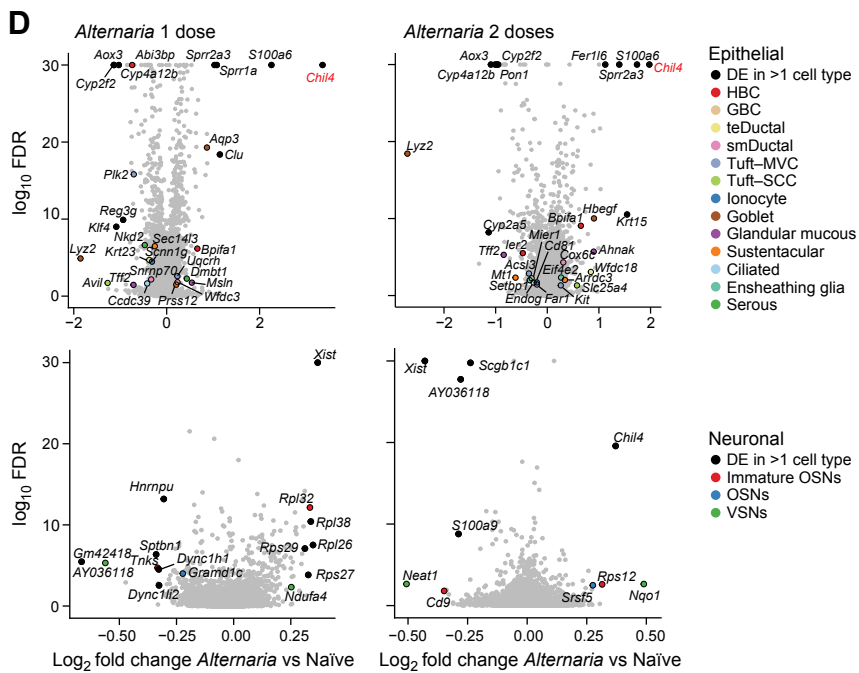

Supplement: NIHMS1986347-supplement-Fig__S8.pdf [file NIHMS1986347-supplement-Fig__S8.pdf]

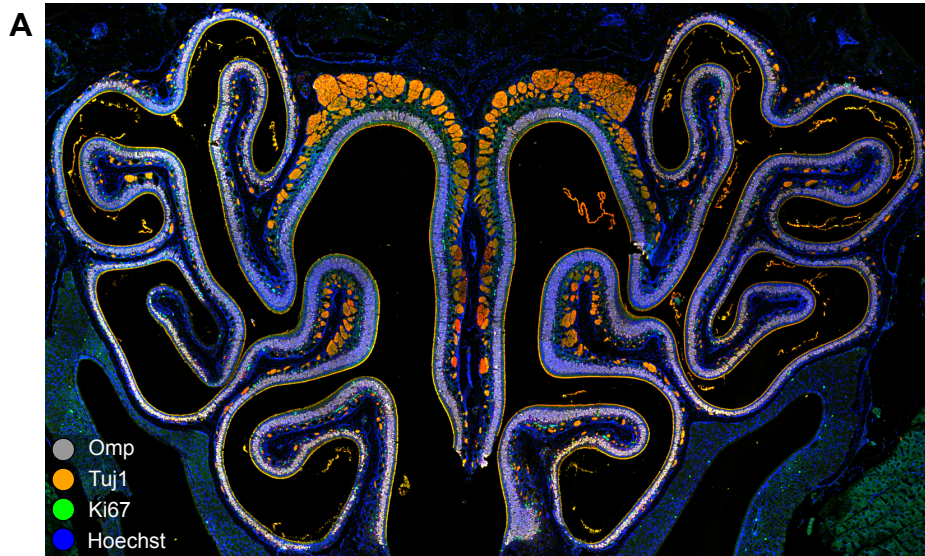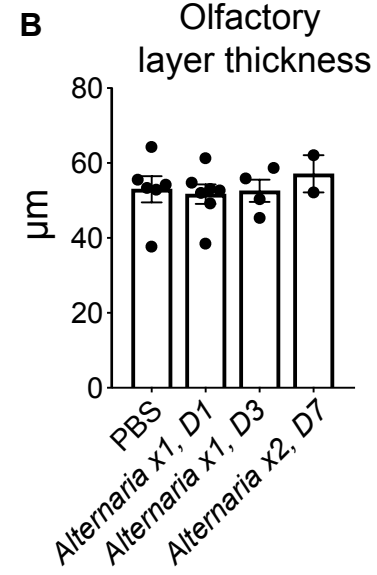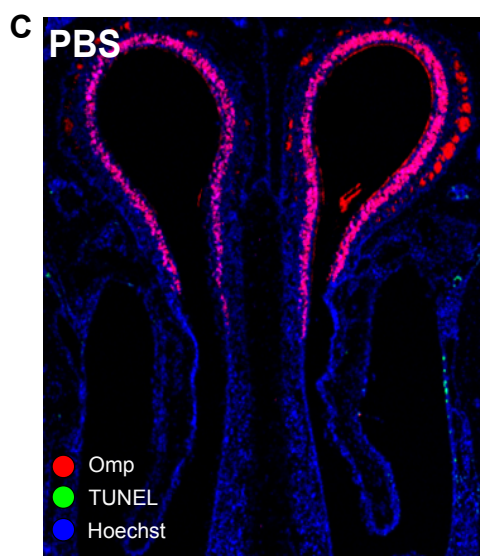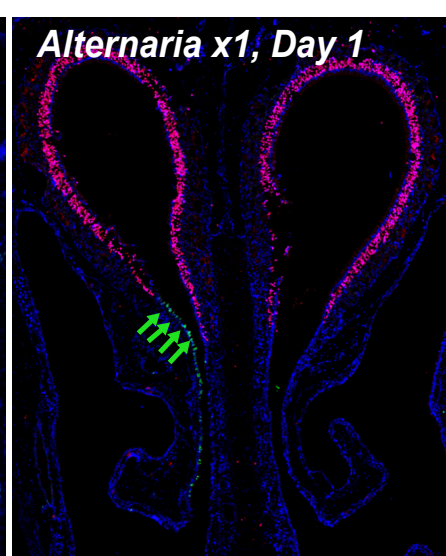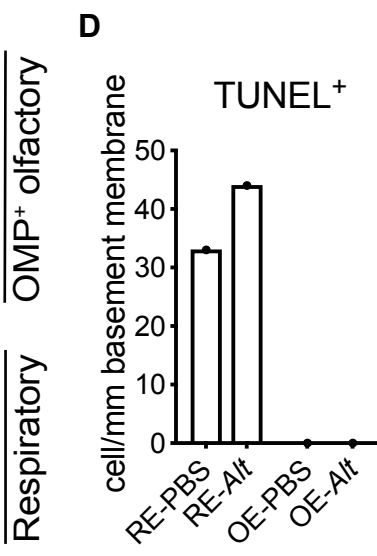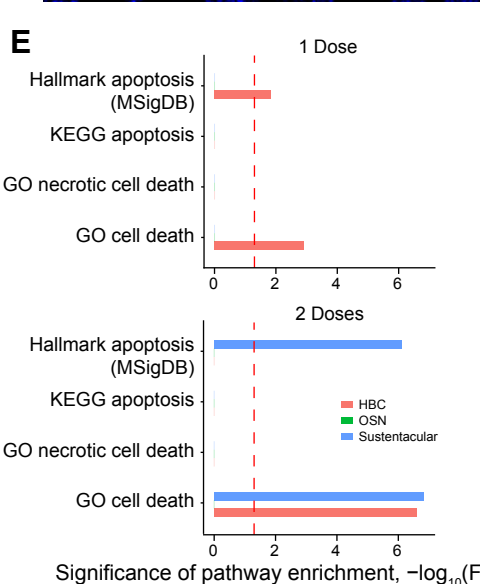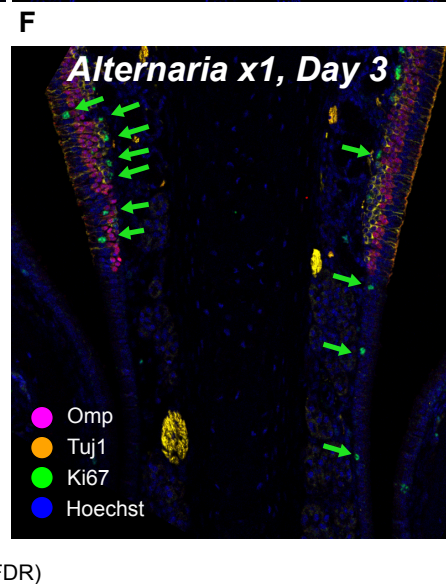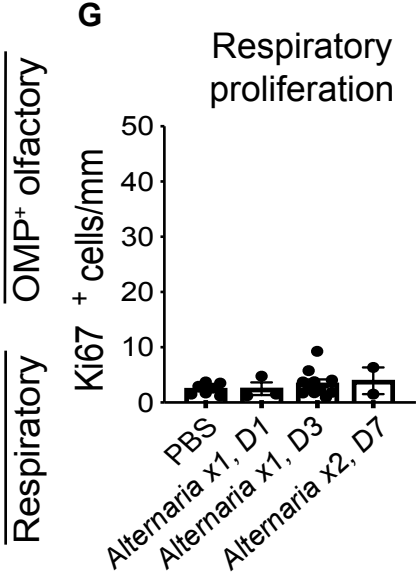

Supplement: NIHMS1986347-supplement-Fig__S9.pdf [file NIHMS1986347-supplement-Fig__S9.pdf]
